# Supplementary material
Source: publisher figshare collection journal article supplement (https://gsajournals.figshare.com/ndownloader/files/27462737)
Supplement: Supplementary file 1 [file 27462737]

## Sheet: Regular
Comparison	Amount1	Amount2	Both_Amount	List1	List2	Both_List1	Both_List2
OurStudyALSblood-Linsley2014	16562	915	484	NODE_348_length_8030_cov_20.2061_g315_i0,NODE_1641_length_5438_cov_10.1362_g1427_i0,NODE_2237_length_4960_cov_20.2406_g1950_i0,NODE_2323_length_4906_cov_11.8462_g2021_i0,NODE_4535_length_3956_cov_11.9818_g3907_i0,NODE_5009_length_3831_cov_19.5384_g4312_i0	NODE_17_length_6767_cov_28624.617796_g10_i1,NODE_22_length_5990_cov_28347.369437_g10_i2,NODE_38649_length_320_cov_0.631579_g37930_i0,NODE_534_length_2553_cov_25071.495631_g511_i0,NODE_9782_length_716_cov_60994.697504_g9410_i0,NODE_20253_length_483_cov_390	NODE_1639_length_5441_cov_31.2018_g1425_i0,NODE_79573_length_1121_cov_403.914_g70548_i0,NODE_426933_length_371_cov_12.2405_g409525_i0,NODE_423208_length_373_cov_38.283_g405802_i0,NODE_40980_length_1606_cov_10.2347_g35778_i0,NODE_708452_length_258_cov_37.3054_g691038_i0,NODE_1751262_length_142_cov_3.17241_g1733848_i0,NODE_412502_length_380_cov_17.2308_g395100_i0,NODE_316236_length_459_cov_310.983_…	NODE_12_length_6954_cov_27660.817748_g10_i0,NODE_420_length_2729_cov_74.652932_g404_i0,NODE_20825_length_474_cov_65.815490_g20215_i0,NODE_718_length_2294_cov_10.084551_g687_i0,NODE_792_length_2209_cov_4.904324_g756_i0,NODE_48397_length_243_cov_4.937500_g47678_i0,NODE_1308_length_1811_cov_87.439752_g1249_i0,NODE_1396_length_1759_cov_13.113109_g1335_i0,NODE_5095_length_971_cov_160.659188_g4886_i0,N…
OurStudyALSblood-Gagliardi2018	15346	6969	1700	NODE_2323_length_4906_cov_11.8462_g2021_i0,NODE_10907_length_2879_cov_21.2415_g9367_i0,NODE_16228_length_2458_cov_6.87973_g14001_i0,NODE_17177_length_2396_cov_10.2755_g14807_i0,NODE_20853_length_2206_cov_16.1144_g17965_i0,NODE_27590_length_1944_cov_7.2255	NODE_47859_length_177_cov_732.669014_g47769_i0,NODE_164783_length_124_cov_141.269663_g164693_i0,NODE_200102_length_113_cov_7.051282_g200012_i0,NODE_207_length_993_cov_17.934238_g172_i0,NODE_1470_length_531_cov_8.368952_g1399_i0,NODE_2430_length_449_cov_4.	NODE_1639_length_5441_cov_31.2018_g1425_i0,NODE_412502_length_380_cov_17.2308_g395100_i0,NODE_310413_length_465_cov_173.356_g293383_i0,NODE_316236_length_459_cov_310.983_g299170_i0,NODE_528324_length_318_cov_32.4563_g510910_i0,NODE_1366484_length_165_cov_	NODE_2_length_5421_cov_302.129038_g1_i0,NODE_11_length_2779_cov_991.271866_g6_i0,NODE_3243_length_409_cov_1877.708556_g3156_i0,NODE_7886_length_306_cov_588.276753_g7796_i0,NODE_16243_length_244_cov_36.052632_g16153_i0,NODE_29658_length_204_cov_5.082840_g2
OurStudyALSblood-Brohawn2016	16494	1198	552	NODE_1641_length_5438_cov_10.1362_g1427_i0,NODE_2237_length_4960_cov_20.2406_g1950_i0,NODE_2323_length_4906_cov_11.8462_g2021_i0,NODE_4535_length_3956_cov_11.9818_g3907_i0,NODE_5009_length_3831_cov_19.5384_g4312_i0,NODE_10907_length_2879_cov_21.2415_g9367	NODE_209782_length_416_cov_2.354571_g201664_i0,NODE_281080_length_365_cov_2.722581_g272933_i0,NODE_543525_length_275_cov_2.586364_g535377_i0,NODE_618645_length_260_cov_1.321951_g610497_i0,NODE_736845_length_242_cov_1.010695_g728697_i0,NODE_3656_length_275	NODE_79573_length_1121_cov_403.914_g70548_i0,NODE_2174428_length_124_cov_4_g2157014_i0,NODE_72106_length_1187_cov_735.995_g63746_i0,NODE_516940_length_323_cov_1114.93_g499526_i0,NODE_196237_length_638_cov_3.96398_g180877_i0,NODE_250195_length_540_cov_542.219_g233728_i0,NODE_421620_length_374_cov_26.8652_g404215_i0,NODE_761122_length_246_cov_6.73298_g743708_i0,NODE_88288_length_1057_cov_5.22455_g7…	NODE_3182_length_2904_cov_743.520534_g2365_i0,NODE_409953_length_309_cov_6.562992_g401805_i0,NODE_3844_length_2698_cov_45.270148_g2872_i0,NODE_159885_length_470_cov_44.298795_g151842_i0,NODE_297586_length_356_cov_2.584718_g289438_i0,NODE_301683_length_353_cov_16.244966_g293535_i0,NODE_336057_length_337_cov_6.411348_g327909_i0,NODE_696767_length_246_cov_3.596859_g688619_i0,NODE_709864_length_245_c…
OurStudyALSblood-Ladd2017	15327	8160	1719	NODE_1641_length_5438_cov_10.1362_g1427_i0,NODE_2323_length_4906_cov_11.8462_g2021_i0,NODE_10907_length_2879_cov_21.2415_g9367_i0,NODE_14852_length_2551_cov_24.3614_g12810_i0,NODE_15370_length_2514_cov_18.5917_g13257_i0,NODE_16228_length_2458_cov_6.87973_	NODE_46164_length_402_cov_8.351585_g43691_i0,NODE_158_length_5296_cov_4475.186033_g70_i1,NODE_160_length_5255_cov_4501.271923_g70_i2,NODE_161_length_5254_cov_4504.154453_g70_i3,NODE_162_length_5253_cov_4500.958061_g70_i4,NODE_163_length_5194_cov_4406.7051	NODE_72106_length_1187_cov_735.995_g63746_i0,NODE_110358_length_924_cov_7.19563_g99047_i0,NODE_171821_length_697_cov_8.26168_g157317_i0,NODE_343553_length_433_cov_363.095_g326301_i0,NODE_1902144_length_135_cov_4.6_g1884730_i0,NODE_294842_length_482_cov_29	NODE_95_length_6803_cov_4015.171014_g70_i0,NODE_155_length_5355_cov_94.988679_g113_i0,NODE_2536_length_1495_cov_52.022917_g113_i4,NODE_16735_length_635_cov_889.693103_g14633_i0,NODE_34179_length_460_cov_3.851852_g31735_i0,NODE_47406_length_397_cov_1512.99
OurStudyALSblood-Brohawn2019	16184	2082	862	NODE_1641_length_5438_cov_10.1362_g1427_i0,NODE_2237_length_4960_cov_20.2406_g1950_i0,NODE_2323_length_4906_cov_11.8462_g2021_i0,NODE_4535_length_3956_cov_11.9818_g3907_i0,NODE_5009_length_3831_cov_19.5384_g4312_i0,NODE_10907_length_2879_cov_21.2415_g9367	NODE_15050_length_2807_cov_40.867605_g2459_i5,NODE_87857_length_1215_cov_9.405932_g74192_i0,NODE_100700_length_1126_cov_6.587534_g85797_i0,NODE_105066_length_1099_cov_5.912594_g89760_i0,NODE_112845_length_1055_cov_13.455882_g96845_i0,NODE_120445_length_10	NODE_1351349_length_167_cov_2.875_g1333935_i0,NODE_1823095_length_139_cov_2.19048_g1805681_i0,NODE_1938023_length_134_cov_2.32911_g1920609_i0,NODE_2050931_length_129_cov_3.71622_g2033517_i0,NODE_323273_length_453_cov_3.54774_g306164_i0,NODE_348_length_803	NODE_10830_length_3185_cov_10.748571_g8358_i0,NODE_25822_length_2235_cov_8.441364_g20439_i0,NODE_26051_length_2227_cov_8.867245_g20621_i0,NODE_38669_length_1854_cov_10.102254_g31243_i0,NODE_46718_length_1688_cov_14.286751_g38127_i0,NODE_54230_length_1566_
OurStudyALSblood-Shin2014	15124	13404	1922	NODE_1641_length_5438_cov_10.1362_g1427_i0,NODE_2323_length_4906_cov_11.8462_g2021_i0,NODE_10907_length_2879_cov_21.2415_g9367_i0,NODE_16228_length_2458_cov_6.87973_g14001_i0,NODE_22994_length_2111_cov_24.7194_g19845_i0,NODE_29525_length_1884_cov_4.97048_	NODE_2_length_18676_cov_8.130572_g0_i1,NODE_107754_length_146_cov_2.162162_g106958_i0,NODE_4_length_10453_cov_4.890670_g2_i0,NODE_50_length_5656_cov_4.608966_g43_i0,NODE_51_length_5637_cov_4.868975_g44_i0,NODE_53_length_5541_cov_4.561932_g46_i0,NODE_67_le	NODE_437974_length_365_cov_4.62581_g420560_i0,NODE_75425_length_1157_cov_7.59528_g66764_i0,NODE_38262_length_1661_cov_4.57161_g33356_i0,NODE_667194_length_270_cov_1.65116_g649780_i0,NODE_569541_length_302_cov_4.417_g552127_i0,NODE_84229_length_1085_cov_43	NODE_1_length_18882_cov_8.115562_g0_i0,NODE_6_length_8569_cov_5.108742_g4_i0,NODE_9_length_7939_cov_4.785046_g6_i0,NODE_12_length_7788_cov_5.108345_g9_i0,NODE_15_length_6972_cov_5.155399_g11_i0,NODE_16_length_6826_cov_1002.273597_g12_i0,NODE_18_length_679
OurStudyALSblood-Humphrys2016	16976	1129	70	NODE_348_length_8030_cov_20.2061_g315_i0,NODE_1450_length_5618_cov_8.01887_g1265_i0,NODE_1641_length_5438_cov_10.1362_g1427_i0,NODE_2237_length_4960_cov_20.2406_g1950_i0,NODE_2323_length_4906_cov_11.8462_g2021_i0,NODE_4535_length_3956_cov_11.9818_g3907_i0	NODE_8_length_9724_cov_8.571724_g7_i0,NODE_11_length_8899_cov_25.124717_g10_i0,NODE_13_length_8697_cov_15.379542_g12_i0,NODE_16_length_8285_cov_16.275334_g15_i0,NODE_18_length_7511_cov_166.398337_g17_i0,NODE_19_length_7425_cov_11.432157_g18_i0,NODE_20_len	NODE_724421_length_255_cov_2.295_g707007_i0,NODE_1159270_length_185_cov_2.49231_g1141856_i0,NODE_853987_length_228_cov_1.73988_g836573_i0,NODE_740894_length_251_cov_3.86224_g723480_i0,NODE_2287134_length_120_cov_2.8_g2269720_i0,NODE_674489_length_267_cov_40.1698_g657075_i0,NODE_1725886_length_143_cov_4.18182_g1708472_i0,NODE_624052_length_283_cov_1.60526_g606638_i0,NODE_1867830_length_137_cov_2.2…	NODE_1_length_20668_cov_31.038956_g0_i0,NODE_2_length_15642_cov_34.666325_g1_i0,NODE_9_length_9352_cov_127.892654_g8_i0,NODE_21_length_7111_cov_19.912415_g20_i0,NODE_32_length_6246_cov_21.892586_g31_i0,NODE_36_length_5946_cov_17.857919_g35_i0,NODE_38_length_5815_cov_17.364410_g37_i0,NODE_41_length_5646_cov_37.176355_g40_i0,NODE_46_length_5449_cov_10.330923_g45_i0,NODE_52_length_5107_cov_221.19635…
OurStudyALSblood-VonSchack2018	16690	321	356	NODE_348_length_8030_cov_20.2061_g315_i0,NODE_1450_length_5618_cov_8.01887_g1265_i0,NODE_1641_length_5438_cov_10.1362_g1427_i0,NODE_2237_length_4960_cov_20.2406_g1950_i0,NODE_2323_length_4906_cov_11.8462_g2021_i0,NODE_4535_length_3956_cov_11.9818_g3907_i0	NODE_8_length_1244_cov_10.178301_g3_i1,NODE_5048_length_142_cov_1.689655_g5041_i0,NODE_5222_length_140_cov_11.211765_g5215_i0,NODE_55_length_620_cov_24.207080_g45_i1,NODE_69_length_556_cov_11.528942_g63_i0,NODE_175_length_390_cov_6.647761_g168_i0,NODE_795_length_240_cov_10.113514_g788_i0,NODE_955_length_225_cov_11.000000_g948_i0,NODE_1094_length_215_cov_7.668750_g1087_i0,NODE_4354_length_147_cov_…	NODE_188830_length_654_cov_20.8447_g173670_i0,NODE_72106_length_1187_cov_735.995_g63746_i0,NODE_109588_length_927_cov_140.202_g98316_i0,NODE_250195_length_540_cov_542.219_g233728_i0,NODE_84229_length_1085_cov_436.188_g74813_i0,NODE_123651_length_860_cov_680.417_g111493_i0,NODE_324274_length_451_cov_373.889_g307155_i0,NODE_210794_length_607_cov_39.1395_g195047_i0,NODE_184139_length_665_cov_119.344…	NODE_2_length_2220_cov_12.242494_g1_i0,NODE_3_length_2149_cov_38.893028_g2_i0,NODE_4_length_2147_cov_14.475621_g3_i0,NODE_107_length_470_cov_12.930120_g100_i0,NODE_7_length_1532_cov_54.402167_g6_i0,NODE_68_length_561_cov_19.790514_g62_i0,NODE_251_length_351_cov_20.668919_g244_i0,NODE_10_length_1202_cov_16.574542_g8_i0,NODE_111_length_459_cov_17.601485_g104_i0,NODE_357_length_318_cov_11.722433_g35…
Linsley2014-Gagliardi2018	788	8058	611	NODE_12_length_6954_cov_27660.817748_g10_i0,NODE_22_length_5990_cov_28347.369437_g10_i2,NODE_38649_length_320_cov_0.631579_g37930_i0,NODE_898_length_2105_cov_5.091787_g756_i1,NODE_48397_length_243_cov_4.937500_g47678_i0,NODE_1308_length_1811_cov_87.439752	NODE_47859_length_177_cov_732.669014_g47769_i0,NODE_164783_length_124_cov_141.269663_g164693_i0,NODE_177062_length_120_cov_6.835294_g176972_i0,NODE_200102_length_113_cov_7.051282_g200012_i0,NODE_21680_length_224_cov_5.925926_g21590_i0,NODE_33141_length_19	NODE_17_length_6767_cov_28624.617796_g10_i1,NODE_1396_length_1759_cov_13.113109_g1335_i0,NODE_12111_length_649_cov_197.991857_g11694_i0,NODE_20948_length_472_cov_189.874142_g20336_i0,NODE_21089_length_470_cov_32.682759_g20476_i0,NODE_74364_length_154_cov_19.495798_g73645_i0,NODE_71880_length_159_cov_56.322581_g71161_i0,NODE_5095_length_971_cov_160.659188_g4886_i0,NODE_29970_length_375_cov_13.9617…	NODE_2_length_5421_cov_302.129038_g1_i0,NODE_11_length_2779_cov_991.271866_g6_i0,NODE_3243_length_409_cov_1877.708556_g3156_i0,NODE_7886_length_306_cov_588.276753_g7796_i0,NODE_16243_length_244_cov_36.052632_g16153_i0,NODE_29658_length_204_cov_5.082840_g29568_i0,NODE_31412_length_200_cov_228.078788_g31322_i0,NODE_38078_length_189_cov_331.311688_g37988_i0,NODE_54005_length_172_cov_2.423358_g53915_…
Linsley2014-Brohawn2016	1151	1502	248	NODE_22_length_5990_cov_28347.369437_g10_i2,NODE_38649_length_320_cov_0.631579_g37930_i0,NODE_718_length_2294_cov_10.084551_g687_i0,NODE_898_length_2105_cov_5.091787_g756_i1,NODE_1396_length_1759_cov_13.113109_g1335_i0,NODE_37859_length_325_cov_0.513793_g	NODE_209782_length_416_cov_2.354571_g201664_i0,NODE_281080_length_365_cov_2.722581_g272933_i0,NODE_409953_length_309_cov_6.562992_g401805_i0,NODE_543525_length_275_cov_2.586364_g535377_i0,NODE_618645_length_260_cov_1.321951_g610497_i0,NODE_3656_length_275	NODE_420_length_2729_cov_74.652932_g404_i0,NODE_39140_length_320_cov_0.526316_g38421_i0,NODE_3330_length_1187_cov_210.453993_g3200_i0,NODE_37499_length_327_cov_474.811644_g36780_i0,NODE_18251_length_519_cov_279.340909_g17702_i0,NODE_25699_length_409_cov_8.037433_g25011_i0,NODE_2753_length_1296_cov_47.632831_g2641_i0,NODE_4157_length_1067_cov_52.985465_g2641_i1,NODE_10546_length_692_cov_134.550989…	NODE_3182_length_2904_cov_743.520534_g2365_i0,NODE_736845_length_242_cov_1.010695_g728697_i0,NODE_3844_length_2698_cov_45.270148_g2872_i0,NODE_159885_length_470_cov_44.298795_g151842_i0,NODE_301683_length_353_cov_16.244966_g293535_i0,NODE_336057_length_337_cov_6.411348_g327909_i0,NODE_4576_length_2521_cov_227.427413_g2365_i4,NODE_5011_length_2430_cov_216.773474_g2365_i7,NODE_14304_length_1530_cov…
Linsley2014-Ladd2017	874	9354	525	NODE_22_length_5990_cov_28347.369437_g10_i2,NODE_38649_length_320_cov_0.631579_g37930_i0,NODE_534_length_2553_cov_25071.495631_g511_i0,NODE_9782_length_716_cov_60994.697504_g9410_i0,NODE_20253_length_483_cov_39099.238839_g19654_i0,NODE_898_length_2105_cov	NODE_46164_length_402_cov_8.351585_g43691_i0,NODE_158_length_5296_cov_4475.186033_g70_i1,NODE_160_length_5255_cov_4501.271923_g70_i2,NODE_161_length_5254_cov_4504.154453_g70_i3,NODE_162_length_5253_cov_4500.958061_g70_i4,NODE_163_length_5194_cov_4406.7051	NODE_3038_length_1240_cov_125.011618_g2912_i0,NODE_30471_length_372_cov_3.537092_g29758_i0,NODE_44362_length_272_cov_4.704641_g43643_i0,NODE_33529_length_353_cov_40.047170_g32813_i0,NODE_43305_length_280_cov_44.400000_g42586_i0,NODE_1071_length_1954_cov_11.356436_g687_i1,NODE_3349_length_1184_cov_57.050479_g3218_i0,NODE_9486_length_727_cov_152.310694_g9121_i0,NODE_22444_length_449_cov_139.688406_…	NODE_95_length_6803_cov_4015.171014_g70_i0,NODE_155_length_5355_cov_94.988679_g113_i0,NODE_2536_length_1495_cov_52.022917_g113_i4,NODE_16735_length_635_cov_889.693103_g14633_i0,NODE_47406_length_397_cov_1512.991228_g44933_i0,NODE_207858_length_221_cov_7111.765060_g205385_i0,NODE_169_length_5105_cov_238.729307_g119_i0,NODE_1370_length_1998_cov_242.979413_g119_i3,NODE_10348_length_789_cov_1919.6171…
Linsley2014-Brohawn2019	1054	2599	345	NODE_22_length_5990_cov_28347.369437_g10_i2,NODE_38649_length_320_cov_0.631579_g37930_i0,NODE_718_length_2294_cov_10.084551_g687_i0,NODE_898_length_2105_cov_5.091787_g756_i1,NODE_37859_length_325_cov_0.513793_g37140_i0,NODE_74408_length_154_cov_6.798319_g	NODE_15050_length_2807_cov_40.867605_g2459_i5,NODE_10830_length_3185_cov_10.748571_g8358_i0,NODE_25822_length_2235_cov_8.441364_g20439_i0,NODE_26051_length_2227_cov_8.867245_g20621_i0,NODE_38669_length_1854_cov_10.102254_g31243_i0,NODE_46718_length_1688_c	NODE_69615_length_165_cov_1.476923_g68896_i0,NODE_2304_length_1406_cov_118.968636_g404_i2,NODE_86497_length_135_cov_6.120000_g85778_i0,NODE_25699_length_409_cov_8.037433_g25011_i0,NODE_6683_length_852_cov_17.641371_g6413_i0,NODE_69614_length_165_cov_1.546154_g68895_i0,NODE_39001_length_320_cov_0.526316_g38282_i0,NODE_38897_length_320_cov_0.526316_g38178_i0,NODE_33857_length_352_cov_0.709779_g3313…	NODE_79489_length_1281_cov_11.274478_g66789_i0,NODE_100107_length_1129_cov_1228.966179_g85254_i0,NODE_276690_length_616_cov_4.650602_g252016_i0,NODE_517605_length_404_cov_42.046070_g489933_i0,NODE_581815_length_372_cov_1146.893175_g553985_i0,NODE_768885_length_306_cov_2.763838_g740979_i0,NODE_790665_length_300_cov_2.452830_g762759_i0,NODE_929644_length_266_cov_2.588745_g901738_i0,NODE_930883_leng…
Linsley2014-Shin2014	1033	14960	366	NODE_17_length_6767_cov_28624.617796_g10_i1,NODE_22_length_5990_cov_28347.369437_g10_i2,NODE_38649_length_320_cov_0.631579_g37930_i0,NODE_534_length_2553_cov_25071.495631_g511_i0,NODE_9782_length_716_cov_60994.697504_g9410_i0,NODE_20253_length_483_cov_390	NODE_1_length_18882_cov_8.115562_g0_i0,NODE_2_length_18676_cov_8.130572_g0_i1,NODE_107754_length_146_cov_2.162162_g106958_i0,NODE_4_length_10453_cov_4.890670_g2_i0,NODE_6_length_8569_cov_5.108742_g4_i0,NODE_9_length_7939_cov_4.785046_g6_i0,NODE_12_length_	NODE_2565_length_1337_cov_44.834869_g2462_i0,NODE_24771_length_420_cov_2.789610_g24092_i0,NODE_34480_length_348_cov_0.718850_g33762_i0,NODE_39209_length_320_cov_0.526316_g38490_i0,NODE_39279_length_320_cov_0.519298_g38560_i0,NODE_37969_length_324_cov_0.519031_g37250_i0,NODE_39205_length_320_cov_0.526316_g38486_i0,NODE_38760_length_320_cov_0.600000_g38041_i0,NODE_65118_length_176_cov_1.808511_g643…	NODE_16_length_6826_cov_1002.273597_g12_i0,NODE_36_length_5958_cov_5.031403_g30_i0,NODE_54_length_5526_cov_5.031688_g47_i0,NODE_174_length_4146_cov_4.689127_g161_i0,NODE_222_length_3853_cov_5.102148_g208_i0,NODE_235_length_3798_cov_5.245815_g220_i0,NODE_238_length_3795_cov_5.419415_g223_i0,NODE_239_length_3792_cov_5.222518_g224_i0,NODE_339_length_3391_cov_5.427294_g314_i0,NODE_420_length_3182_cov…
Linsley2014-Humphrys2016	1373	1173	26	NODE_12_length_6954_cov_27660.817748_g10_i0,NODE_22_length_5990_cov_28347.369437_g10_i2,NODE_20825_length_474_cov_65.815490_g20215_i0,NODE_38649_length_320_cov_0.631579_g37930_i0,NODE_534_length_2553_cov_25071.495631_g511_i0,NODE_9782_length_716_cov_60994	NODE_1_length_20668_cov_31.038956_g0_i0,NODE_8_length_9724_cov_8.571724_g7_i0,NODE_9_length_9352_cov_127.892654_g8_i0,NODE_11_length_8899_cov_25.124717_g10_i0,NODE_13_length_8697_cov_15.379542_g12_i0,NODE_16_length_8285_cov_16.275334_g15_i0,NODE_18_length	NODE_35632_length_341_cov_0.732026_g34914_i0,NODE_36939_length_332_cov_0.555556_g36220_i0,NODE_49127_length_239_cov_2.382353_g48408_i0,NODE_33857_length_352_cov_0.709779_g33139_i0,NODE_24629_length_421_cov_7.608808_g23953_i0,NODE_78996_length_147_cov_1.875000_g78277_i0,NODE_22796_length_444_cov_93.731051_g22146_i0,NODE_71775_length_160_cov_2.752000_g71056_i0,NODE_15205_length_579_cov_143.950368_g…	NODE_2_length_15642_cov_34.666325_g1_i0,NODE_38_length_5815_cov_17.364410_g37_i0,NODE_60_length_4821_cov_21.173940_g57_i0,NODE_75_length_4415_cov_12.650229_g72_i0,NODE_159_length_2610_cov_10.244618_g152_i0,NODE_166_length_2536_cov_5.944780_g33_i1,NODE_204_length_2173_cov_5.185552_g193_i0,NODE_222_length_2057_cov_7.687313_g211_i0,NODE_226_length_2023_cov_1864.523882_g215_i0,NODE_238_length_1962_co…
Linsley2014-VonSchack2018	1169	447	230	NODE_17_length_6767_cov_28624.617796_g10_i1,NODE_22_length_5990_cov_28347.369437_g10_i2,NODE_38649_length_320_cov_0.631579_g37930_i0,NODE_534_length_2553_cov_25071.495631_g511_i0,NODE_9782_length_716_cov_60994.697504_g9410_i0,NODE_20253_length_483_cov_390	NODE_8_length_1244_cov_10.178301_g3_i1,NODE_5048_length_142_cov_1.689655_g5041_i0,NODE_5222_length_140_cov_11.211765_g5215_i0,NODE_10_length_1202_cov_16.574542_g8_i0,NODE_55_length_620_cov_24.207080_g45_i1,NODE_69_length_556_cov_11.528942_g63_i0,NODE_98_length_478_cov_7.664303_g91_i0,NODE_101_length_474_cov_26.871122_g94_i0,NODE_148_length_415_cov_4.100000_g141_i0,NODE_175_length_390_cov_6.647761…	NODE_1797_length_1574_cov_89.599090_g404_i1,NODE_3330_length_1187_cov_210.453993_g3200_i0,NODE_420_length_2729_cov_74.652932_g404_i0,NODE_8782_length_753_cov_300.839833_g8442_i0,NODE_2753_length_1296_cov_47.632831_g2641_i0,NODE_5126_length_968_cov_133.258307_g4917_i0,NODE_16442_length_554_cov_107.518304_g15928_i0,NODE_6289_length_877_cov_358.826603_g6032_i0,NODE_2681_length_1310_cov_356.942745_g2…	NODE_2_length_2220_cov_12.242494_g1_i0,NODE_3_length_2149_cov_38.893028_g2_i0,NODE_4_length_2147_cov_14.475621_g3_i0,NODE_107_length_470_cov_12.930120_g100_i0,NODE_7_length_1532_cov_54.402167_g6_i0,NODE_68_length_561_cov_19.790514_g62_i0,NODE_251_length_351_cov_20.668919_g244_i0,NODE_111_length_459_cov_17.601485_g104_i0,NODE_357_length_318_cov_11.722433_g350_i0,NODE_720_length_249_cov_26.474227_g…
Gagliardi2018-Brohawn2016	8283	1364	386	NODE_11_length_2779_cov_991.271866_g6_i0,NODE_7886_length_306_cov_588.276753_g7796_i0,NODE_16243_length_244_cov_36.052632_g16153_i0,NODE_29658_length_204_cov_5.082840_g29568_i0,NODE_31412_length_200_cov_228.078788_g31322_i0,NODE_38078_length_189_cov_331.3	NODE_209782_length_416_cov_2.354571_g201664_i0,NODE_281080_length_365_cov_2.722581_g272933_i0,NODE_618645_length_260_cov_1.321951_g610497_i0,NODE_736845_length_242_cov_1.010695_g728697_i0,NODE_3656_length_2751_cov_764.311944_g2365_i1,NODE_3766_length_2724	NODE_146_length_1127_cov_284.520147_g117_i0,NODE_165003_length_124_cov_14.056180_g164913_i0,NODE_126200_length_137_cov_3.676471_g126110_i0,NODE_208_length_992_cov_431.018809_g173_i0,NODE_554_length_730_cov_333.995683_g506_i0,NODE_51254_length_174_cov_5.892086_g51164_i0,NODE_779_length_653_cov_167.823625_g722_i0,NODE_1202_length_568_cov_7.288931_g1135_i0,NODE_317_length_871_cov_411.964115_g281_i0,…	NODE_3182_length_2904_cov_743.520534_g2365_i0,NODE_409953_length_309_cov_6.562992_g401805_i0,NODE_543525_length_275_cov_2.586364_g535377_i0,NODE_3844_length_2698_cov_45.270148_g2872_i0,NODE_159885_length_470_cov_44.298795_g151842_i0,NODE_297586_length_356_cov_2.584718_g289438_i0,NODE_301683_length_353_cov_16.244966_g293535_i0,NODE_336057_length_337_cov_6.411348_g327909_i0,NODE_696767_length_246_c…
Gagliardi2018-Ladd2017	7321	8531	1348	NODE_38078_length_189_cov_331.311688_g37988_i0,NODE_54005_length_172_cov_2.423358_g53915_i0,NODE_83543_length_152_cov_11.529915_g83453_i0,NODE_85166_length_151_cov_15.206897_g85076_i0,NODE_114738_length_140_cov_10.142857_g114648_i0,NODE_118344_length_139_	NODE_46164_length_402_cov_8.351585_g43691_i0,NODE_158_length_5296_cov_4475.186033_g70_i1,NODE_160_length_5255_cov_4501.271923_g70_i2,NODE_161_length_5254_cov_4504.154453_g70_i3,NODE_162_length_5253_cov_4500.958061_g70_i4,NODE_163_length_5194_cov_4406.7051	NODE_208_length_992_cov_431.018809_g173_i0,NODE_109776_length_142_cov_2.028037_g109686_i0,NODE_74019_length_158_cov_2.300813_g73929_i0,NODE_6032_length_334_cov_13.494983_g5942_i0,NODE_13730_length_257_cov_25.918919_g13640_i0,NODE_23842_length_217_cov_85.0	NODE_95_length_6803_cov_4015.171014_g70_i0,NODE_63553_length_352_cov_2.168350_g61080_i0,NODE_177349_length_242_cov_1.016043_g174876_i0,NODE_155_length_5355_cov_94.988679_g113_i0,NODE_719_length_2697_cov_92.420893_g113_i1,NODE_16735_length_635_cov_889.6931
Gagliardi2018-Brohawn2019	8064	2339	605	NODE_7886_length_306_cov_588.276753_g7796_i0,NODE_16243_length_244_cov_36.052632_g16153_i0,NODE_29658_length_204_cov_5.082840_g29568_i0,NODE_31412_length_200_cov_228.078788_g31322_i0,NODE_38078_length_189_cov_331.311688_g37988_i0,NODE_47859_length_177_cov	NODE_15050_length_2807_cov_40.867605_g2459_i5,NODE_26051_length_2227_cov_8.867245_g20621_i0,NODE_54230_length_1566_cov_8.180274_g44633_i0,NODE_55465_length_1547_cov_14.157407_g45697_i0,NODE_72093_length_1351_cov_9.579787_g60247_i0,NODE_87857_length_1215_c	NODE_117303_length_140_cov_2.733333_g117213_i0,NODE_124794_length_137_cov_8.421569_g124704_i0,NODE_112828_length_141_cov_3.009434_g112738_i0,NODE_107481_length_142_cov_11.728972_g107391_i0,NODE_66701_length_162_cov_4.496063_g66611_i0,NODE_105636_length_143_cov_4.407407_g105546_i0,NODE_138176_length_134_cov_2.484848_g138086_i0,NODE_146_length_1127_cov_284.520147_g117_i0,NODE_205601_length_112_cov_…	NODE_10830_length_3185_cov_10.748571_g8358_i0,NODE_25822_length_2235_cov_8.441364_g20439_i0,NODE_38669_length_1854_cov_10.102254_g31243_i0,NODE_46718_length_1688_cov_14.286751_g38127_i0,NODE_60370_length_1482_cov_7.250173_g49980_i0,NODE_79489_length_1281_cov_11.274478_g66789_i0,NODE_92739_length_1179_cov_8.539336_g78586_i0,NODE_100107_length_1129_cov_1228.966179_g85254_i0,NODE_108892_length_1076_…
Gagliardi2018-Shin2014	7106	13763	1563	NODE_11_length_2779_cov_991.271866_g6_i0,NODE_7886_length_306_cov_588.276753_g7796_i0,NODE_16243_length_244_cov_36.052632_g16153_i0,NODE_29658_length_204_cov_5.082840_g29568_i0,NODE_31412_length_200_cov_228.078788_g31322_i0,NODE_38078_length_189_cov_331.3	NODE_1_length_18882_cov_8.115562_g0_i0,NODE_2_length_18676_cov_8.130572_g0_i1,NODE_107754_length_146_cov_2.162162_g106958_i0,NODE_4_length_10453_cov_4.890670_g2_i0,NODE_20_length_6746_cov_5.014901_g15_i0,NODE_26_length_6340_cov_5.374782_g21_i0,NODE_36_len	NODE_142188_length_133_cov_2.306122_g142098_i0,NODE_7881_length_307_cov_3.202206_g7791_i0,NODE_120377_length_139_cov_3.153846_g120287_i0,NODE_157773_length_127_cov_11.380435_g157683_i0,NODE_137_length_1155_cov_3992.772321_g110_i0,NODE_130604_length_136_co	NODE_6_length_8569_cov_5.108742_g4_i0,NODE_9_length_7939_cov_4.785046_g6_i0,NODE_12_length_7788_cov_5.108345_g9_i0,NODE_15_length_6972_cov_5.155399_g11_i0,NODE_16_length_6826_cov_1002.273597_g12_i0,NODE_18_length_6796_cov_4.773406_g13_i0,NODE_19_length_67
Gagliardi2018-Humphrys2016	8607	1137	62	NODE_11_length_2779_cov_991.271866_g6_i0,NODE_3243_length_409_cov_1877.708556_g3156_i0,NODE_7886_length_306_cov_588.276753_g7796_i0,NODE_16243_length_244_cov_36.052632_g16153_i0,NODE_29658_length_204_cov_5.082840_g29568_i0,NODE_31412_length_200_cov_228.07	NODE_8_length_9724_cov_8.571724_g7_i0,NODE_13_length_8697_cov_15.379542_g12_i0,NODE_16_length_8285_cov_16.275334_g15_i0,NODE_18_length_7511_cov_166.398337_g17_i0,NODE_19_length_7425_cov_11.432157_g18_i0,NODE_20_length_7346_cov_10.176519_g19_i0,NODE_21_len	NODE_167949_length_123_cov_10.636364_g167859_i0,NODE_8133_length_304_cov_2.951673_g8043_i0,NODE_5262_length_348_cov_27.092652_g5172_i0,NODE_123677_length_138_cov_2.776699_g123587_i0,NODE_19958_length_230_cov_2.630769_g19868_i0,NODE_139388_length_133_cov_7.632653_g139298_i0,NODE_118416_length_139_cov_10.163462_g118326_i0,NODE_48633_length_177_cov_3.147887_g48543_i0,NODE_188387_length_117_cov_4.121…	NODE_1_length_20668_cov_31.038956_g0_i0,NODE_2_length_15642_cov_34.666325_g1_i0,NODE_9_length_9352_cov_127.892654_g8_i0,NODE_11_length_8899_cov_25.124717_g10_i0,NODE_36_length_5946_cov_17.857919_g35_i0,NODE_38_length_5815_cov_17.364410_g37_i0,NODE_41_length_5646_cov_37.176355_g40_i0,NODE_46_length_5449_cov_10.330923_g45_i0,NODE_52_length_5107_cov_221.196358_g50_i0,NODE_55_length_5031_cov_17.92785…
Gagliardi2018-VonSchack2018	8407	415	262	NODE_11_length_2779_cov_991.271866_g6_i0,NODE_16243_length_244_cov_36.052632_g16153_i0,NODE_29658_length_204_cov_5.082840_g29568_i0,NODE_31412_length_200_cov_228.078788_g31322_i0,NODE_38078_length_189_cov_331.311688_g37988_i0,NODE_47859_length_177_cov_732	NODE_4_length_2147_cov_14.475621_g3_i0,NODE_5048_length_142_cov_1.689655_g5041_i0,NODE_10_length_1202_cov_16.574542_g8_i0,NODE_55_length_620_cov_24.207080_g45_i1,NODE_111_length_459_cov_17.601485_g104_i0,NODE_18_length_925_cov_13.431034_g16_i0,NODE_45_length_671_cov_27.379870_g42_i0,NODE_69_length_556_cov_11.528942_g63_i0,NODE_93_length_489_cov_20.967742_g86_i0,NODE_98_length_478_cov_7.664303_g91…	NODE_747_length_660_cov_404.204800_g691_i0,NODE_208_length_992_cov_431.018809_g173_i0,NODE_667_length_686_cov_210.279570_g616_i0,NODE_779_length_653_cov_167.823625_g722_i0,NODE_137_length_1155_cov_3992.772321_g110_i0,NODE_258_length_923_cov_886.442568_g222_i0,NODE_698_length_677_cov_720.951713_g644_i0,NODE_60204_length_166_cov_22.053435_g60114_i0,NODE_3189_length_411_cov_32.250000_g3102_i0,NODE_8…	NODE_2_length_2220_cov_12.242494_g1_i0,NODE_3_length_2149_cov_38.893028_g2_i0,NODE_8_length_1244_cov_10.178301_g3_i1,NODE_107_length_470_cov_12.930120_g100_i0,NODE_7_length_1532_cov_54.402167_g6_i0,NODE_68_length_561_cov_19.790514_g62_i0,NODE_251_length_351_cov_20.668919_g244_i0,NODE_5222_length_140_cov_11.211765_g5215_i0,NODE_357_length_318_cov_11.722433_g350_i0,NODE_720_length_249_cov_26.474227…
Brohawn2016-Ladd2017	1124	9253	626	NODE_209782_length_416_cov_2.354571_g201664_i0,NODE_409953_length_309_cov_6.562992_g401805_i0,NODE_618645_length_260_cov_1.321951_g610497_i0,NODE_736845_length_242_cov_1.010695_g728697_i0,NODE_5718_length_2304_cov_871.240107_g2365_i9,NODE_718647_length_24	NODE_46164_length_402_cov_8.351585_g43691_i0,NODE_158_length_5296_cov_4475.186033_g70_i1,NODE_160_length_5255_cov_4501.271923_g70_i2,NODE_161_length_5254_cov_4504.154453_g70_i3,NODE_162_length_5253_cov_4500.958061_g70_i4,NODE_163_length_5194_cov_4406.7051	NODE_3844_length_2698_cov_45.270148_g2872_i0,NODE_77784_length_662_cov_5.958814_g70470_i0,NODE_398071_length_313_cov_5.465116_g389923_i0,NODE_101351_length_583_cov_18.535985_g90764_i1,NODE_62382_length_738_cov_13.518302_g55584_i0,NODE_5375_length_2360_cov_813.385683_g2365_i8,NODE_49331_length_828_cov_35.486417_g43168_i0,NODE_286687_length_361_cov_13.140523_g278539_i0,NODE_25175_length_1162_cov_7.…	NODE_95_length_6803_cov_4015.171014_g70_i0,NODE_155_length_5355_cov_94.988679_g113_i0,NODE_16735_length_635_cov_889.693103_g14633_i0,NODE_207858_length_221_cov_7111.765060_g205385_i0,NODE_169_length_5105_cov_238.729307_g119_i0,NODE_10348_length_789_cov_1919.617166_g8578_i0,NODE_15555_length_657_cov_330.377076_g13507_i0,NODE_54933_length_373_cov_432.811321_g52460_i0,NODE_59966_length_360_cov_7.242…
Brohawn2016-Brohawn2019	418	1612	1332	NODE_736845_length_242_cov_1.010695_g728697_i0,NODE_3656_length_2751_cov_764.311944_g2365_i1,NODE_301683_length_353_cov_16.244966_g293535_i0,NODE_509223_length_283_cov_1.464912_g501075_i0,NODE_558498_length_272_cov_1.387097_g550350_i0,NODE_662376_length_252_cov_2.228426_g654228_i0,NODE_696767_length_246_cov_3.596859_g688619_i0,NODE_11128_length_1718_cov_158.162357_g2365_i14,NODE_68548_length_704_…	NODE_15050_length_2807_cov_40.867605_g2459_i5,NODE_353512_length_526_cov_2.299389_g327160_i0,NODE_361764_length_518_cov_2.217391_g335273_i0,NODE_422122_length_467_cov_2.574074_g394966_i0,NODE_438146_length_455_cov_1.595238_g410869_i0,NODE_447761_length_44	NODE_24886_length_1169_cov_7.347397_g20670_i0,NODE_14542_length_1519_cov_6.862022_g11653_i0,NODE_9038_length_1891_cov_7.264161_g7008_i0,NODE_11087_length_1722_cov_7.811038_g8724_i0,NODE_45218_length_866_cov_11.314427_g39334_i0,NODE_13624_length_1566_cov_6	NODE_10830_length_3185_cov_10.748571_g8358_i0,NODE_25822_length_2235_cov_8.441364_g20439_i0,NODE_26051_length_2227_cov_8.867245_g20621_i0,NODE_38669_length_1854_cov_10.102254_g31243_i0,NODE_46718_length_1688_cov_14.286751_g38127_i0,NODE_54230_length_1566_
Brohawn2016-Shin2014	1495	15071	255	NODE_209782_length_416_cov_2.354571_g201664_i0,NODE_281080_length_365_cov_2.722581_g272933_i0,NODE_409953_length_309_cov_6.562992_g401805_i0,NODE_543525_length_275_cov_2.586364_g535377_i0,NODE_618645_length_260_cov_1.321951_g610497_i0,NODE_736845_length_2	NODE_1_length_18882_cov_8.115562_g0_i0,NODE_2_length_18676_cov_8.130572_g0_i1,NODE_107754_length_146_cov_2.162162_g106958_i0,NODE_4_length_10453_cov_4.890670_g2_i0,NODE_6_length_8569_cov_5.108742_g4_i0,NODE_9_length_7939_cov_4.785046_g6_i0,NODE_12_length_	NODE_4947_length_2442_cov_156.122748_g3721_i0,NODE_736857_length_242_cov_1.005348_g728709_i0,NODE_692960_length_247_cov_1.953125_g684812_i0,NODE_745910_length_241_cov_1.021505_g737762_i0,NODE_916825_length_205_cov_4.893333_g908677_i0,NODE_10136_length_1793_cov_66.858458_g7917_i0,NODE_407548_length_310_cov_4.380392_g399400_i0,NODE_14963_length_1498_cov_89.263340_g12011_i0,NODE_376223_length_321_co…	NODE_16_length_6826_cov_1002.273597_g12_i0,NODE_129_length_4501_cov_4.910434_g119_i0,NODE_135_length_4446_cov_5.501247_g125_i0,NODE_238_length_3795_cov_5.419415_g223_i0,NODE_280_length_3577_cov_5.152739_g263_i0,NODE_295_length_3511_cov_919.776755_g12_i6,NODE_521_length_2946_cov_5.119203_g400_i1,NODE_604_length_2796_cov_781.124593_g12_i14,NODE_865_length_2420_cov_4.646960_g806_i0,NODE_906_length_2…
Brohawn2016-Humphrys2016	1688	1137	62	NODE_3182_length_2904_cov_743.520534_g2365_i0,NODE_209782_length_416_cov_2.354571_g201664_i0,NODE_281080_length_365_cov_2.722581_g272933_i0,NODE_409953_length_309_cov_6.562992_g401805_i0,NODE_543525_length_275_cov_2.586364_g535377_i0,NODE_618645_length_26	NODE_8_length_9724_cov_8.571724_g7_i0,NODE_9_length_9352_cov_127.892654_g8_i0,NODE_11_length_8899_cov_25.124717_g10_i0,NODE_13_length_8697_cov_15.379542_g12_i0,NODE_18_length_7511_cov_166.398337_g17_i0,NODE_19_length_7425_cov_11.432157_g18_i0,NODE_20_leng	NODE_11087_length_1722_cov_7.811038_g8724_i0,NODE_222786_length_404_cov_9.982808_g214655_i0,NODE_196479_length_428_cov_6.268097_g188376_i0,NODE_173946_length_453_cov_3.025126_g165871_i0,NODE_531896_length_277_cov_5.635135_g523748_i0,NODE_376223_length_321_cov_5.387218_g368075_i0,NODE_758267_length_239_cov_2.543478_g750119_i0,NODE_761892_length_238_cov_4.021858_g753744_i0,NODE_472503_length_292_co…	NODE_1_length_20668_cov_31.038956_g0_i0,NODE_2_length_15642_cov_34.666325_g1_i0,NODE_16_length_8285_cov_16.275334_g15_i0,NODE_21_length_7111_cov_19.912415_g20_i0,NODE_32_length_6246_cov_21.892586_g31_i0,NODE_36_length_5946_cov_17.857919_g35_i0,NODE_41_length_5646_cov_37.176355_g40_i0,NODE_46_length_5449_cov_10.330923_g45_i0,NODE_52_length_5107_cov_221.196358_g50_i0,NODE_55_length_5031_cov_17.9278…
Brohawn2016-VonSchack2018	1550	477	200	NODE_209782_length_416_cov_2.354571_g201664_i0,NODE_281080_length_365_cov_2.722581_g272933_i0,NODE_409953_length_309_cov_6.562992_g401805_i0,NODE_543525_length_275_cov_2.586364_g535377_i0,NODE_618645_length_260_cov_1.321951_g610497_i0,NODE_736845_length_2	NODE_107_length_470_cov_12.930120_g100_i0,NODE_68_length_561_cov_19.790514_g62_i0,NODE_5048_length_142_cov_1.689655_g5041_i0,NODE_5222_length_140_cov_11.211765_g5215_i0,NODE_55_length_620_cov_24.207080_g45_i1,NODE_29_length_768_cov_7.706872_g26_i0,NODE_41_length_685_cov_17.223810_g38_i0,NODE_69_length_556_cov_11.528942_g63_i0,NODE_77_length_533_cov_10.359833_g71_i0,NODE_175_length_390_cov_6.64776…	NODE_3766_length_2724_cov_837.361184_g2365_i2,NODE_3844_length_2698_cov_45.270148_g2872_i0,NODE_18280_length_1361_cov_21.876723_g14859_i0,NODE_37299_length_953_cov_10.693764_g31947_i0,NODE_8719_length_1918_cov_529.259259_g6750_i0,NODE_124543_length_528_cov_75.101480_g116629_i0,NODE_29063_length_1078_cov_10.414467_g24413_i0,NODE_201199_length_423_cov_37.081522_g193089_i0,NODE_33924_length_997_cov_…	NODE_2_length_2220_cov_12.242494_g1_i0,NODE_3_length_2149_cov_38.893028_g2_i0,NODE_4_length_2147_cov_14.475621_g3_i0,NODE_8_length_1244_cov_10.178301_g3_i1,NODE_7_length_1532_cov_54.402167_g6_i0,NODE_251_length_351_cov_20.668919_g244_i0,NODE_10_length_1202_cov_16.574542_g8_i0,NODE_111_length_459_cov_17.601485_g104_i0,NODE_357_length_318_cov_11.722433_g350_i0,NODE_720_length_249_cov_26.474227_g713…
Ladd2017-Brohawn2019	9009	2074	870	NODE_46164_length_402_cov_8.351585_g43691_i0,NODE_95_length_6803_cov_4015.171014_g70_i0,NODE_158_length_5296_cov_4475.186033_g70_i1,NODE_160_length_5255_cov_4501.271923_g70_i2,NODE_161_length_5254_cov_4504.154453_g70_i3,NODE_162_length_5253_cov_4500.95806	NODE_46718_length_1688_cov_14.286751_g38127_i0,NODE_54230_length_1566_cov_8.180274_g44633_i0,NODE_55465_length_1547_cov_14.157407_g45697_i0,NODE_87857_length_1215_cov_9.405932_g74192_i0,NODE_100700_length_1126_cov_6.587534_g85797_i0,NODE_105066_length_109	NODE_64104_length_350_cov_16590.284746_g61631_i0,NODE_6984_length_939_cov_54.013575_g5530_i0,NODE_32260_length_472_cov_2.889688_g29834_i0,NODE_147973_length_257_cov_1.876238_g145500_i0,NODE_111972_length_284_cov_1.620087_g109499_i0,NODE_103257_length_292_	NODE_15050_length_2807_cov_40.867605_g2459_i5,NODE_10830_length_3185_cov_10.748571_g8358_i0,NODE_25822_length_2235_cov_8.441364_g20439_i0,NODE_26051_length_2227_cov_8.867245_g20621_i0,NODE_38669_length_1854_cov_10.102254_g31243_i0,NODE_60370_length_1482_c
Ladd2017-Shin2014	8823	14270	1056	NODE_46164_length_402_cov_8.351585_g43691_i0,NODE_95_length_6803_cov_4015.171014_g70_i0,NODE_158_length_5296_cov_4475.186033_g70_i1,NODE_160_length_5255_cov_4501.271923_g70_i2,NODE_161_length_5254_cov_4504.154453_g70_i3,NODE_162_length_5253_cov_4500.95806	NODE_1_length_18882_cov_8.115562_g0_i0,NODE_2_length_18676_cov_8.130572_g0_i1,NODE_107754_length_146_cov_2.162162_g106958_i0,NODE_4_length_10453_cov_4.890670_g2_i0,NODE_6_length_8569_cov_5.108742_g4_i0,NODE_9_length_7939_cov_4.785046_g6_i0,NODE_15_length_	NODE_153012_length_254_cov_1.899497_g150539_i0,NODE_2222_length_1600_cov_101.655016_g1198_i2,NODE_144534_length_259_cov_2.328431_g142061_i0,NODE_165406_length_247_cov_1.973958_g162933_i0,NODE_203706_length_226_cov_3.128655_g201233_i0,NODE_192339_length_23	NODE_12_length_7788_cov_5.108345_g9_i0,NODE_16_length_6826_cov_1002.273597_g12_i0,NODE_19_length_6765_cov_4.858990_g14_i0,NODE_24_length_6450_cov_4.998441_g19_i0,NODE_34_length_5988_cov_5.336973_g28_i0,NODE_36_length_5958_cov_5.031403_g30_i0,NODE_41_lengt
Ladd2017-Humphrys2016	9794	1114	85	NODE_46164_length_402_cov_8.351585_g43691_i0,NODE_95_length_6803_cov_4015.171014_g70_i0,NODE_158_length_5296_cov_4475.186033_g70_i1,NODE_160_length_5255_cov_4501.271923_g70_i2,NODE_161_length_5254_cov_4504.154453_g70_i3,NODE_162_length_5253_cov_4500.95806	NODE_8_length_9724_cov_8.571724_g7_i0,NODE_9_length_9352_cov_127.892654_g8_i0,NODE_13_length_8697_cov_15.379542_g12_i0,NODE_16_length_8285_cov_16.275334_g15_i0,NODE_18_length_7511_cov_166.398337_g17_i0,NODE_19_length_7425_cov_11.432157_g18_i0,NODE_20_leng	NODE_231956_length_196_cov_3.211155_g229483_i0,NODE_49653_length_390_cov_4.241791_g47180_i0,NODE_222140_length_205_cov_11.720000_g219667_i0,NODE_24735_length_533_cov_17.253138_g22412_i0,NODE_203611_length_226_cov_3.350877_g201138_i0,NODE_75283_length_329_cov_3.762774_g72810_i0,NODE_65691_length_347_cov_6.654110_g63218_i0,NODE_34249_length_459_cov_16.504950_g31805_i0,NODE_36605_length_446_cov_5.90…	NODE_1_length_20668_cov_31.038956_g0_i0,NODE_2_length_15642_cov_34.666325_g1_i0,NODE_11_length_8899_cov_25.124717_g10_i0,NODE_21_length_7111_cov_19.912415_g20_i0,NODE_32_length_6246_cov_21.892586_g31_i0,NODE_38_length_5815_cov_17.364410_g37_i0,NODE_41_length_5646_cov_37.176355_g40_i0,NODE_46_length_5449_cov_10.330923_g45_i0,NODE_52_length_5107_cov_221.196358_g50_i0,NODE_54_length_5036_cov_11.5111…
Ladd2017-VonSchack2018	9520	318	359	NODE_46164_length_402_cov_8.351585_g43691_i0,NODE_95_length_6803_cov_4015.171014_g70_i0,NODE_158_length_5296_cov_4475.186033_g70_i1,NODE_160_length_5255_cov_4501.271923_g70_i2,NODE_161_length_5254_cov_4504.154453_g70_i3,NODE_162_length_5253_cov_4500.95806	NODE_5048_length_142_cov_1.689655_g5041_i0,NODE_720_length_249_cov_26.474227_g713_i0,NODE_45_length_671_cov_27.379870_g42_i0,NODE_215_length_367_cov_23.551282_g208_i0,NODE_428_length_299_cov_22.651639_g421_i0,NODE_795_length_240_cov_10.113514_g788_i0,NODE_4354_length_147_cov_3.282609_g4347_i0,NODE_4898_length_143_cov_2.000000_g4891_i0,NODE_5095_length_141_cov_5.523256_g5088_i0,NODE_6686_length_13…	NODE_2153_length_1625_cov_1109.948408_g1531_i0,NODE_274_length_4254_cov_3422.894022_g70_i6,NODE_550_length_3098_cov_1755.695038_g70_i13,NODE_585_length_2986_cov_689.205391_g414_i0,NODE_19189_length_597_cov_134.608856_g17005_i0,NODE_2222_length_1600_cov_101.655016_g1198_i2,NODE_5511_length_1042_cov_3777.397163_g4259_i0,NODE_6433_length_973_cov_210.180828_g5048_i0,NODE_14037_length_687_cov_502.1993…	NODE_2_length_2220_cov_12.242494_g1_i0,NODE_3_length_2149_cov_38.893028_g2_i0,NODE_4_length_2147_cov_14.475621_g3_i0,NODE_8_length_1244_cov_10.178301_g3_i1,NODE_107_length_470_cov_12.930120_g100_i0,NODE_7_length_1532_cov_54.402167_g6_i0,NODE_68_length_561_cov_19.790514_g62_i0,NODE_251_length_351_cov_20.668919_g244_i0,NODE_5222_length_140_cov_11.211765_g5215_i0,NODE_10_length_1202_cov_16.574542_g8…
Brohawn2019-Shin2014	2584	14966	360	NODE_15050_length_2807_cov_40.867605_g2459_i5,NODE_25822_length_2235_cov_8.441364_g20439_i0,NODE_54230_length_1566_cov_8.180274_g44633_i0,NODE_60370_length_1482_cov_7.250173_g49980_i0,NODE_72093_length_1351_cov_9.579787_g60247_i0,NODE_87857_length_1215_co	NODE_1_length_18882_cov_8.115562_g0_i0,NODE_2_length_18676_cov_8.130572_g0_i1,NODE_107754_length_146_cov_2.162162_g106958_i0,NODE_4_length_10453_cov_4.890670_g2_i0,NODE_6_length_8569_cov_5.108742_g4_i0,NODE_9_length_7939_cov_4.785046_g6_i0,NODE_12_length_	NODE_121372_length_1013_cov_457.771984_g104640_i0,NODE_725854_length_319_cov_1.521127_g697948_i0,NODE_1080293_length_242_cov_1.101449_g1052387_i0,NODE_1045802_length_247_cov_2.146226_g1017896_i0,NODE_110458_length_1067_cov_2438.283915_g24586_i1,NODE_996806_length_255_cov_1.045455_g968900_i0,NODE_868750_length_280_cov_1.408163_g840844_i0,NODE_325037_length_555_cov_5.598077_g299180_i0,NODE_143055_l…	NODE_16_length_6826_cov_1002.273597_g12_i0,NODE_117_length_4601_cov_4.865747_g107_i0,NODE_129_length_4501_cov_4.910434_g119_i0,NODE_135_length_4446_cov_5.501247_g125_i0,NODE_275_length_3601_cov_5.116096_g258_i0,NODE_281_length_3577_cov_5.112084_g264_i0,NODE_421_length_3179_cov_4.701336_g392_i0,NODE_521_length_2946_cov_5.119203_g400_i1,NODE_604_length_2796_cov_781.124593_g12_i14,NODE_865_length_24…
Brohawn2019-Humphrys2016	2871	1126	73	NODE_15050_length_2807_cov_40.867605_g2459_i5,NODE_10830_length_3185_cov_10.748571_g8358_i0,NODE_25822_length_2235_cov_8.441364_g20439_i0,NODE_26051_length_2227_cov_8.867245_g20621_i0,NODE_46718_length_1688_cov_14.286751_g38127_i0,NODE_54230_length_1566_c	NODE_8_length_9724_cov_8.571724_g7_i0,NODE_11_length_8899_cov_25.124717_g10_i0,NODE_13_length_8697_cov_15.379542_g12_i0,NODE_18_length_7511_cov_166.398337_g17_i0,NODE_19_length_7425_cov_11.432157_g18_i0,NODE_20_length_7346_cov_10.176519_g19_i0,NODE_23_len	NODE_38669_length_1854_cov_10.102254_g31243_i0,NODE_708975_length_324_cov_4.262976_g681069_i0,NODE_670574_length_337_cov_4.837748_g642668_i0,NODE_136228_length_949_cov_6.460613_g118344_i0,NODE_456349_length_442_cov_3.909091_g428956_i0,NODE_943129_length_263_cov_6.741228_g915223_i0,NODE_667235_length_338_cov_6.669967_g639329_i0,NODE_761787_length_308_cov_2.494505_g733881_i0,NODE_325037_length_555_…	NODE_1_length_20668_cov_31.038956_g0_i0,NODE_2_length_15642_cov_34.666325_g1_i0,NODE_9_length_9352_cov_127.892654_g8_i0,NODE_16_length_8285_cov_16.275334_g15_i0,NODE_21_length_7111_cov_19.912415_g20_i0,NODE_32_length_6246_cov_21.892586_g31_i0,NODE_36_length_5946_cov_17.857919_g35_i0,NODE_41_length_5646_cov_37.176355_g40_i0,NODE_46_length_5449_cov_10.330923_g45_i0,NODE_52_length_5107_cov_221.19635…
Brohawn2019-VonSchack2018	2672	405	272	NODE_15050_length_2807_cov_40.867605_g2459_i5,NODE_10830_length_3185_cov_10.748571_g8358_i0,NODE_25822_length_2235_cov_8.441364_g20439_i0,NODE_26051_length_2227_cov_8.867245_g20621_i0,NODE_38669_length_1854_cov_10.102254_g31243_i0,NODE_46718_length_1688_c	NODE_8_length_1244_cov_10.178301_g3_i1,NODE_251_length_351_cov_20.668919_g244_i0,NODE_5048_length_142_cov_1.689655_g5041_i0,NODE_5222_length_140_cov_11.211765_g5215_i0,NODE_720_length_249_cov_26.474227_g713_i0,NODE_98_length_478_cov_7.664303_g91_i0,NODE_101_length_474_cov_26.871122_g94_i0,NODE_148_length_415_cov_4.100000_g141_i0,NODE_201_length_376_cov_24.738318_g194_i0,NODE_215_length_367_cov_23…	NODE_113404_length_1052_cov_193.525074_g97358_i0,NODE_169705_length_833_cov_132.756892_g149506_i0,NODE_67647_length_1396_cov_93.789860_g56351_i0,NODE_327336_length_552_cov_226.911025_g301438_i0,NODE_123592_length_1003_cov_1231.870868_g106690_i0,NODE_121372_length_1013_cov_457.771984_g104640_i0,NODE_540537_length_392_cov_13.837535_g512811_i0,NODE_240934_length_672_cov_440.084772_g217423_i0,NODE_22…	NODE_2_length_2220_cov_12.242494_g1_i0,NODE_3_length_2149_cov_38.893028_g2_i0,NODE_4_length_2147_cov_14.475621_g3_i0,NODE_107_length_470_cov_12.930120_g100_i0,NODE_7_length_1532_cov_54.402167_g6_i0,NODE_68_length_561_cov_19.790514_g62_i0,NODE_10_length_1202_cov_16.574542_g8_i0,NODE_55_length_620_cov_24.207080_g45_i1,NODE_111_length_459_cov_17.601485_g104_i0,NODE_357_length_318_cov_11.722433_g350_…
Shin2014-Humphrys2016	15264	1137	62	NODE_1_length_18882_cov_8.115562_g0_i0,NODE_2_length_18676_cov_8.130572_g0_i1,NODE_107754_length_146_cov_2.162162_g106958_i0,NODE_4_length_10453_cov_4.890670_g2_i0,NODE_6_length_8569_cov_5.108742_g4_i0,NODE_9_length_7939_cov_4.785046_g6_i0,NODE_12_length_	NODE_8_length_9724_cov_8.571724_g7_i0,NODE_9_length_9352_cov_127.892654_g8_i0,NODE_13_length_8697_cov_15.379542_g12_i0,NODE_18_length_7511_cov_166.398337_g17_i0,NODE_19_length_7425_cov_11.432157_g18_i0,NODE_20_length_7346_cov_10.176519_g19_i0,NODE_21_leng	NODE_280_length_3577_cov_5.152739_g263_i0,NODE_755_length_2579_cov_3.698506_g511_i1,NODE_11109_length_573_cov_4.228625_g10459_i0,NODE_1209_length_2098_cov_4.102278_g1125_i0,NODE_6768_length_828_cov_4.742749_g6302_i0,NODE_62080_length_184_cov_2.342282_g61284_i0,NODE_61524_length_185_cov_1.600000_g60728_i0,NODE_2312_length_1543_cov_4.397878_g2143_i0,NODE_48200_length_210_cov_1.097143_g47404_i0,NODE…	NODE_1_length_20668_cov_31.038956_g0_i0,NODE_2_length_15642_cov_34.666325_g1_i0,NODE_11_length_8899_cov_25.124717_g10_i0,NODE_16_length_8285_cov_16.275334_g15_i0,NODE_33_length_6236_cov_6.723184_g32_i0,NODE_36_length_5946_cov_17.857919_g35_i0,NODE_38_length_5815_cov_17.364410_g37_i0,NODE_41_length_5646_cov_37.176355_g40_i0,NODE_46_length_5449_cov_10.330923_g45_i0,NODE_52_length_5107_cov_221.19635…
Shin2014-VonSchack2018	15140	491	186	NODE_1_length_18882_cov_8.115562_g0_i0,NODE_2_length_18676_cov_8.130572_g0_i1,NODE_107754_length_146_cov_2.162162_g106958_i0,NODE_4_length_10453_cov_4.890670_g2_i0,NODE_6_length_8569_cov_5.108742_g4_i0,NODE_9_length_7939_cov_4.785046_g6_i0,NODE_12_length_	NODE_8_length_1244_cov_10.178301_g3_i1,NODE_5222_length_140_cov_11.211765_g5215_i0,NODE_55_length_620_cov_24.207080_g45_i1,NODE_111_length_459_cov_17.601485_g104_i0,NODE_357_length_318_cov_11.722433_g350_i0,NODE_29_length_768_cov_7.706872_g26_i0,NODE_45_length_671_cov_27.379870_g42_i0,NODE_69_length_556_cov_11.528942_g63_i0,NODE_77_length_533_cov_10.359833_g71_i0,NODE_98_length_478_cov_7.664303_g…	NODE_3199_length_1307_cov_651.023585_g2970_i0,NODE_4186_length_1121_cov_54.028545_g3874_i0,NODE_3280_length_1292_cov_8.108990_g3039_i0,NODE_6841_length_821_cov_77.919847_g6371_i0,NODE_309_length_3472_cov_986.640384_g12_i8,NODE_1698_length_1812_cov_693.662915_g1578_i0,NODE_318_length_3453_cov_1125.312171_g12_i11,NODE_1895_length_1716_cov_4.530637_g1751_i0,NODE_2088_length_1623_cov_10.232997_g1928_…	NODE_2_length_2220_cov_12.242494_g1_i0,NODE_3_length_2149_cov_38.893028_g2_i0,NODE_4_length_2147_cov_14.475621_g3_i0,NODE_107_length_470_cov_12.930120_g100_i0,NODE_7_length_1532_cov_54.402167_g6_i0,NODE_68_length_561_cov_19.790514_g62_i0,NODE_251_length_351_cov_20.668919_g244_i0,NODE_5048_length_142_cov_1.689655_g5041_i0,NODE_10_length_1202_cov_16.574542_g8_i0,NODE_720_length_249_cov_26.474227_g7…
Humphrys2016-VonSchack2018	1182	660	17	NODE_1_length_20668_cov_31.038956_g0_i0,NODE_2_length_15642_cov_34.666325_g1_i0,NODE_8_length_9724_cov_8.571724_g7_i0,NODE_11_length_8899_cov_25.124717_g10_i0,NODE_13_length_8697_cov_15.379542_g12_i0,NODE_16_length_8285_cov_16.275334_g15_i0,NODE_18_length	NODE_107_length_470_cov_12.930120_g100_i0,NODE_7_length_1532_cov_54.402167_g6_i0,NODE_68_length_561_cov_19.790514_g62_i0,NODE_251_length_351_cov_20.668919_g244_i0,NODE_5048_length_142_cov_1.689655_g5041_i0,NODE_5222_length_140_cov_11.211765_g5215_i0,NODE_10_length_1202_cov_16.574542_g8_i0,NODE_55_length_620_cov_24.207080_g45_i1,NODE_111_length_459_cov_17.601485_g104_i0,NODE_357_length_318_cov_11.…	NODE_119_length_3307_cov_1880.085793_g116_i0,NODE_135_length_2960_cov_9607.314974_g116_i2,NODE_59_length_4895_cov_309.180992_g56_i0,NODE_132_length_3068_cov_9151.563890_g116_i1,NODE_129_length_3119_cov_10393.911880_g125_i0,NODE_353_length_1324_cov_8762.743105_g116_i6,NODE_226_length_2023_cov_1864.523882_g215_i0,NODE_178_length_2458_cov_8823.873075_g125_i2,NODE_159_length_2610_cov_10.244618_g152_i…	NODE_2_length_2220_cov_12.242494_g1_i0,NODE_3_length_2149_cov_38.893028_g2_i0,NODE_4_length_2147_cov_14.475621_g3_i0,NODE_8_length_1244_cov_10.178301_g3_i1,NODE_14_length_1024_cov_43.363261_g12_i0,NODE_3331_length_157_cov_3.539216_g3324_i0,NODE_4031_length_150_cov_2.905263_g4024_i0,NODE_4140_length_149_cov_2.925532_g4133_i0,NODE_153_length_410_cov_17.036620_g146_i0,NODE_331_length_326_cov_4.50184…

## Sheet: Dark
Comparison	Amount1	Amount2	Both_Amount	List1	List2	Both_List1	Both_List2
OurStudyALSblood-Linsley2014	2980	49	0	NODE_1955_length_5180_cov_35.5196_g1711_i0,NODE_1758683_length_142_cov_2.11494_g1741269_i0,NODE_1867701_length_137_cov_2.2439_g1850287_i0,NODE_1938336_length_134_cov_2.32911_g1920922_i0,NODE_2903753_length_106_cov_5.39216_g2886339_i0,NODE_777418_length_24	NODE_36906_length_332_cov_0.973064_g36187_i0,NODE_59771_length_192_cov_2.617834_g59052_i0,NODE_37195_length_330_cov_0.610169_g36476_i0,NODE_37598_length_327_cov_0.667808_g36879_i0,NODE_37957_length_324_cov_0.657439_g37238_i0,NODE_38411_length_320_cov_0.936842_g37692_i0,NODE_38430_length_320_cov_0.842105_g37711_i0,NODE_38434_length_320_cov_0.842105_g37715_i0,NODE_38449_length_320_cov_0.817544_g377…
OurStudyALSblood-Gagliardi2018	2958	2550	22	NODE_1955_length_5180_cov_35.5196_g1711_i0,NODE_1758683_length_142_cov_2.11494_g1741269_i0,NODE_1867701_length_137_cov_2.2439_g1850287_i0,NODE_1938336_length_134_cov_2.32911_g1920922_i0,NODE_2903753_length_106_cov_5.39216_g2886339_i0,NODE_777418_length_24	NODE_3607_length_396_cov_4.157895_g3518_i0,NODE_11365_length_273_cov_6.000000_g11275_i0,NODE_11880_length_269_cov_9.423077_g11790_i0,NODE_15190_length_250_cov_3.362791_g15100_i0,NODE_20645_length_227_cov_9.369792_g20555_i0,NODE_24573_length_216_cov_3.4585	NODE_2795283_length_109_cov_3.40741_g2777869_i0,NODE_2651145_length_112_cov_3.22807_g2633731_i0,NODE_2715129_length_111_cov_2.60714_g2697715_i0,NODE_1822821_length_139_cov_2.19048_g1805407_i0,NODE_2842110_length_108_cov_3.43396_g2824696_i0,NODE_215585_length_598_cov_27.6409_g199731_i0,NODE_1442387_length_160_cov_3.24762_g1424973_i0,NODE_1675276_length_146_cov_2.35165_g1657862_i0,NODE_2935775_leng…	NODE_11139_length_275_cov_4.150000_g11049_i0,NODE_79241_length_155_cov_2.741667_g79151_i0,NODE_36692_length_192_cov_3.133758_g36602_i0,NODE_57753_length_168_cov_18.473684_g57663_i0,NODE_209351_length_111_cov_4.315789_g209261_i0,NODE_99338_length_146_cov_1.477477_g99248_i0,NODE_105581_length_143_cov_4.555556_g105491_i0,NODE_127599_length_136_cov_18.079208_g127509_i0,NODE_133084_length_135_cov_4.10…
OurStudyALSblood-Brohawn2016	2979	41	1	NODE_1955_length_5180_cov_35.5196_g1711_i0,NODE_1758683_length_142_cov_2.11494_g1741269_i0,NODE_1867701_length_137_cov_2.2439_g1850287_i0,NODE_1938336_length_134_cov_2.32911_g1920922_i0,NODE_2903753_length_106_cov_5.39216_g2886339_i0,NODE_777418_length_24	NODE_36811_length_959_cov_12.997788_g31493_i0,NODE_199733_length_425_cov_4.894595_g191626_i0,NODE_888801_length_215_cov_4.662500_g880653_i0,NODE_291947_length_359_cov_2.503289_g283799_i0,NODE_397304_length_314_cov_1.316602_g389156_i0,NODE_469243_length_293_cov_2.079832_g461095_i0,NODE_474522_length_291_cov_3.661017_g466374_i0,NODE_479328_length_290_cov_2.246809_g471180_i0,NODE_483758_length_289_c…	NODE_1582349_length_151_cov_2.5_g1564935_i0	NODE_618477_length_260_cov_1.902439_g610329_i0
OurStudyALSblood-Ladd2017	2933	29380	47	NODE_1955_length_5180_cov_35.5196_g1711_i0,NODE_1758683_length_142_cov_2.11494_g1741269_i0,NODE_1867701_length_137_cov_2.2439_g1850287_i0,NODE_1938336_length_134_cov_2.32911_g1920922_i0,NODE_2903753_length_106_cov_5.39216_g2886339_i0,NODE_777418_length_24	NODE_98403_length_297_cov_9.041322_g95930_i0,NODE_98405_length_297_cov_8.933884_g95932_i0,NODE_92663_length_304_cov_4.036145_g90190_i0,NODE_84948_length_314_cov_4.911197_g82475_i0,NODE_98415_length_297_cov_8.347107_g95942_i0,NODE_5782_length_1020_cov_9.39
OurStudyALSblood-Brohawn2019	2978	188	2	NODE_1955_length_5180_cov_35.5196_g1711_i0,NODE_1758683_length_142_cov_2.11494_g1741269_i0,NODE_1867701_length_137_cov_2.2439_g1850287_i0,NODE_1938336_length_134_cov_2.32911_g1920922_i0,NODE_2903753_length_106_cov_5.39216_g2886339_i0,NODE_777418_length_24	NODE_164634_length_849_cov_1.829238_g144734_i0,NODE_240773_length_673_cov_4.968652_g217262_i0,NODE_287610_length_601_cov_4.415194_g262642_i0,NODE_266601_length_631_cov_3.040268_g242232_i0,NODE_821887_length_291_cov_4.312500_g793981_i0,NODE_332646_length_547_cov_3.835938_g306650_i0,NODE_356114_length_523_cov_5.549180_g329708_i0,NODE_990540_length_256_cov_1.040724_g962634_i0,NODE_436293_length_456_…	NODE_2430043_length_116_cov_3.77049_g2412629_i0,NODE_1582349_length_151_cov_2.5_g1564935_i0	NODE_1238664_length_205_cov_2.082353_g1210758_i0,NODE_964956_length_260_cov_2.168889_g937050_i0
OurStudyALSblood-Shin2014	2980	1010	0	NODE_1955_length_5180_cov_35.5196_g1711_i0,NODE_1758683_length_142_cov_2.11494_g1741269_i0,NODE_1867701_length_137_cov_2.2439_g1850287_i0,NODE_1938336_length_134_cov_2.32911_g1920922_i0,NODE_2903753_length_106_cov_5.39216_g2886339_i0,NODE_777418_length_24	NODE_29544_length_283_cov_1.290323_g28748_i0,NODE_3291_length_1290_cov_3.596016_g3049_i0,NODE_4877_length_1021_cov_3.517241_g4527_i0,NODE_6743_length_830_cov_5.728302_g6277_i0,NODE_7148_length_796_cov_3.806833_g6659_i0,NODE_7363_length_777_cov_4.909704_g6
OurStudyALSblood-Humphrys2016	2980	2	0	NODE_1955_length_5180_cov_35.5196_g1711_i0,NODE_1758683_length_142_cov_2.11494_g1741269_i0,NODE_1867701_length_137_cov_2.2439_g1850287_i0,NODE_1938336_length_134_cov_2.32911_g1920922_i0,NODE_2903753_length_106_cov_5.39216_g2886339_i0,NODE_777418_length_24	NODE_2724_length_246_cov_1.000000_g2690_i0,NODE_2929_length_243_cov_1.021277_g2895_i0
OurStudyALSblood-VonSchack2018	2979	18	1	NODE_1955_length_5180_cov_35.5196_g1711_i0,NODE_1758683_length_142_cov_2.11494_g1741269_i0,NODE_1867701_length_137_cov_2.2439_g1850287_i0,NODE_1938336_length_134_cov_2.32911_g1920922_i0,NODE_2903753_length_106_cov_5.39216_g2886339_i0,NODE_777418_length_24	NODE_24_length_857_cov_5.978803_g21_i0,NODE_37_length_701_cov_9.058824_g34_i0,NODE_62_length_582_cov_5.705882_g56_i0,NODE_254_length_351_cov_5.743243_g247_i0,NODE_364_length_317_cov_5.354962_g357_i0,NODE_509_length_281_cov_4.084071_g502_i0,NODE_1462_length_198_cov_5.937063_g1455_i0,NODE_1700_length_189_cov_5.917910_g1693_i0,NODE_1836_length_185_cov_3.346154_g1829_i0,NODE_2202_length_175_cov_6.766…	NODE_2296706_length_120_cov_2.04615_g2279292_i0	NODE_7549_length_124_cov_5.420290_g7542_i0
Linsley2014-Gagliardi2018	49	2572	0	NODE_36906_length_332_cov_0.973064_g36187_i0,NODE_59771_length_192_cov_2.617834_g59052_i0,NODE_37195_length_330_cov_0.610169_g36476_i0,NODE_37598_length_327_cov_0.667808_g36879_i0,NODE_37957_length_324_cov_0.657439_g37238_i0,NODE_38411_length_320_cov_0.936842_g37692_i0,NODE_38430_length_320_cov_0.842105_g37711_i0,NODE_38434_length_320_cov_0.842105_g37715_i0,NODE_38449_length_320_cov_0.817544_g377…	NODE_3607_length_396_cov_4.157895_g3518_i0,NODE_11365_length_273_cov_6.000000_g11275_i0,NODE_11880_length_269_cov_9.423077_g11790_i0,NODE_15190_length_250_cov_3.362791_g15100_i0,NODE_20645_length_227_cov_9.369792_g20555_i0,NODE_24573_length_216_cov_3.4585
Linsley2014-Brohawn2016	49	42	0	NODE_36906_length_332_cov_0.973064_g36187_i0,NODE_59771_length_192_cov_2.617834_g59052_i0,NODE_37195_length_330_cov_0.610169_g36476_i0,NODE_37598_length_327_cov_0.667808_g36879_i0,NODE_37957_length_324_cov_0.657439_g37238_i0,NODE_38411_length_320_cov_0.936842_g37692_i0,NODE_38430_length_320_cov_0.842105_g37711_i0,NODE_38434_length_320_cov_0.842105_g37715_i0,NODE_38449_length_320_cov_0.817544_g377…	NODE_36811_length_959_cov_12.997788_g31493_i0,NODE_199733_length_425_cov_4.894595_g191626_i0,NODE_888801_length_215_cov_4.662500_g880653_i0,NODE_291947_length_359_cov_2.503289_g283799_i0,NODE_397304_length_314_cov_1.316602_g389156_i0,NODE_469243_length_293_cov_2.079832_g461095_i0,NODE_474522_length_291_cov_3.661017_g466374_i0,NODE_479328_length_290_cov_2.246809_g471180_i0,NODE_483758_length_289_c…
Linsley2014-Ladd2017	44	29422	5	NODE_59771_length_192_cov_2.617834_g59052_i0,NODE_37195_length_330_cov_0.610169_g36476_i0,NODE_37598_length_327_cov_0.667808_g36879_i0,NODE_37957_length_324_cov_0.657439_g37238_i0,NODE_38411_length_320_cov_0.936842_g37692_i0,NODE_38430_length_320_cov_0.842105_g37711_i0,NODE_38434_length_320_cov_0.842105_g37715_i0,NODE_38449_length_320_cov_0.817544_g37730_i0,NODE_38469_length_320_cov_0.736842_g377…	NODE_98403_length_297_cov_9.041322_g95930_i0,NODE_98405_length_297_cov_8.933884_g95932_i0,NODE_92663_length_304_cov_4.036145_g90190_i0,NODE_84948_length_314_cov_4.911197_g82475_i0,NODE_98415_length_297_cov_8.347107_g95942_i0,NODE_5782_length_1020_cov_9.39
Linsley2014-Brohawn2019	49	190	0	NODE_36906_length_332_cov_0.973064_g36187_i0,NODE_59771_length_192_cov_2.617834_g59052_i0,NODE_37195_length_330_cov_0.610169_g36476_i0,NODE_37598_length_327_cov_0.667808_g36879_i0,NODE_37957_length_324_cov_0.657439_g37238_i0,NODE_38411_length_320_cov_0.936842_g37692_i0,NODE_38430_length_320_cov_0.842105_g37711_i0,NODE_38434_length_320_cov_0.842105_g37715_i0,NODE_38449_length_320_cov_0.817544_g377…	NODE_164634_length_849_cov_1.829238_g144734_i0,NODE_240773_length_673_cov_4.968652_g217262_i0,NODE_287610_length_601_cov_4.415194_g262642_i0,NODE_266601_length_631_cov_3.040268_g242232_i0,NODE_821887_length_291_cov_4.312500_g793981_i0,NODE_332646_length_547_cov_3.835938_g306650_i0,NODE_356114_length_523_cov_5.549180_g329708_i0,NODE_990540_length_256_cov_1.040724_g962634_i0,NODE_436293_length_456_…
Linsley2014-Shin2014	49	1010	0	NODE_36906_length_332_cov_0.973064_g36187_i0,NODE_59771_length_192_cov_2.617834_g59052_i0,NODE_37195_length_330_cov_0.610169_g36476_i0,NODE_37598_length_327_cov_0.667808_g36879_i0,NODE_37957_length_324_cov_0.657439_g37238_i0,NODE_38411_length_320_cov_0.936842_g37692_i0,NODE_38430_length_320_cov_0.842105_g37711_i0,NODE_38434_length_320_cov_0.842105_g37715_i0,NODE_38449_length_320_cov_0.817544_g377…	NODE_29544_length_283_cov_1.290323_g28748_i0,NODE_3291_length_1290_cov_3.596016_g3049_i0,NODE_4877_length_1021_cov_3.517241_g4527_i0,NODE_6743_length_830_cov_5.728302_g6277_i0,NODE_7148_length_796_cov_3.806833_g6659_i0,NODE_7363_length_777_cov_4.909704_g6
Linsley2014-Humphrys2016	49	2	0	NODE_36906_length_332_cov_0.973064_g36187_i0,NODE_59771_length_192_cov_2.617834_g59052_i0,NODE_37195_length_330_cov_0.610169_g36476_i0,NODE_37598_length_327_cov_0.667808_g36879_i0,NODE_37957_length_324_cov_0.657439_g37238_i0,NODE_38411_length_320_cov_0.936842_g37692_i0,NODE_38430_length_320_cov_0.842105_g37711_i0,NODE_38434_length_320_cov_0.842105_g37715_i0,NODE_38449_length_320_cov_0.817544_g377…	NODE_2724_length_246_cov_1.000000_g2690_i0,NODE_2929_length_243_cov_1.021277_g2895_i0
Linsley2014-VonSchack2018	49	19	0	NODE_36906_length_332_cov_0.973064_g36187_i0,NODE_59771_length_192_cov_2.617834_g59052_i0,NODE_37195_length_330_cov_0.610169_g36476_i0,NODE_37598_length_327_cov_0.667808_g36879_i0,NODE_37957_length_324_cov_0.657439_g37238_i0,NODE_38411_length_320_cov_0.936842_g37692_i0,NODE_38430_length_320_cov_0.842105_g37711_i0,NODE_38434_length_320_cov_0.842105_g37715_i0,NODE_38449_length_320_cov_0.817544_g377…	NODE_24_length_857_cov_5.978803_g21_i0,NODE_37_length_701_cov_9.058824_g34_i0,NODE_62_length_582_cov_5.705882_g56_i0,NODE_254_length_351_cov_5.743243_g247_i0,NODE_364_length_317_cov_5.354962_g357_i0,NODE_509_length_281_cov_4.084071_g502_i0,NODE_1462_length_198_cov_5.937063_g1455_i0,NODE_1700_length_189_cov_5.917910_g1693_i0,NODE_1836_length_185_cov_3.346154_g1829_i0,NODE_2202_length_175_cov_6.766…
Gagliardi2018-Brohawn2016	2572	42	0	NODE_3607_length_396_cov_4.157895_g3518_i0,NODE_11365_length_273_cov_6.000000_g11275_i0,NODE_11880_length_269_cov_9.423077_g11790_i0,NODE_15190_length_250_cov_3.362791_g15100_i0,NODE_20645_length_227_cov_9.369792_g20555_i0,NODE_24573_length_216_cov_3.4585	NODE_36811_length_959_cov_12.997788_g31493_i0,NODE_199733_length_425_cov_4.894595_g191626_i0,NODE_888801_length_215_cov_4.662500_g880653_i0,NODE_291947_length_359_cov_2.503289_g283799_i0,NODE_397304_length_314_cov_1.316602_g389156_i0,NODE_469243_length_293_cov_2.079832_g461095_i0,NODE_474522_length_291_cov_3.661017_g466374_i0,NODE_479328_length_290_cov_2.246809_g471180_i0,NODE_483758_length_289_c…
Gagliardi2018-Ladd2017	2541	29396	31	NODE_3607_length_396_cov_4.157895_g3518_i0,NODE_11365_length_273_cov_6.000000_g11275_i0,NODE_11880_length_269_cov_9.423077_g11790_i0,NODE_15190_length_250_cov_3.362791_g15100_i0,NODE_20645_length_227_cov_9.369792_g20555_i0,NODE_24573_length_216_cov_3.4585	NODE_98403_length_297_cov_9.041322_g95930_i0,NODE_98405_length_297_cov_8.933884_g95932_i0,NODE_92663_length_304_cov_4.036145_g90190_i0,NODE_84948_length_314_cov_4.911197_g82475_i0,NODE_98415_length_297_cov_8.347107_g95942_i0,NODE_5782_length_1020_cov_9.39
Gagliardi2018-Brohawn2019	2572	190	0	NODE_3607_length_396_cov_4.157895_g3518_i0,NODE_11365_length_273_cov_6.000000_g11275_i0,NODE_11880_length_269_cov_9.423077_g11790_i0,NODE_15190_length_250_cov_3.362791_g15100_i0,NODE_20645_length_227_cov_9.369792_g20555_i0,NODE_24573_length_216_cov_3.4585	NODE_164634_length_849_cov_1.829238_g144734_i0,NODE_240773_length_673_cov_4.968652_g217262_i0,NODE_287610_length_601_cov_4.415194_g262642_i0,NODE_266601_length_631_cov_3.040268_g242232_i0,NODE_821887_length_291_cov_4.312500_g793981_i0,NODE_332646_length_547_cov_3.835938_g306650_i0,NODE_356114_length_523_cov_5.549180_g329708_i0,NODE_990540_length_256_cov_1.040724_g962634_i0,NODE_436293_length_456_…
Gagliardi2018-Shin2014	2570	1008	2	NODE_3607_length_396_cov_4.157895_g3518_i0,NODE_11365_length_273_cov_6.000000_g11275_i0,NODE_11880_length_269_cov_9.423077_g11790_i0,NODE_15190_length_250_cov_3.362791_g15100_i0,NODE_20645_length_227_cov_9.369792_g20555_i0,NODE_24573_length_216_cov_3.4585	NODE_29544_length_283_cov_1.290323_g28748_i0,NODE_3291_length_1290_cov_3.596016_g3049_i0,NODE_4877_length_1021_cov_3.517241_g4527_i0,NODE_6743_length_830_cov_5.728302_g6277_i0,NODE_7148_length_796_cov_3.806833_g6659_i0,NODE_7363_length_777_cov_4.909704_g6	NODE_173223_length_121_cov_13.337209_g173133_i0,NODE_136530_length_134_cov_4.696970_g136440_i0	NODE_112703_length_144_cov_1.458716_g111907_i0,NODE_125729_length_136_cov_2.108911_g124933_i0
Gagliardi2018-Humphrys2016	2572	2	0	NODE_3607_length_396_cov_4.157895_g3518_i0,NODE_11365_length_273_cov_6.000000_g11275_i0,NODE_11880_length_269_cov_9.423077_g11790_i0,NODE_15190_length_250_cov_3.362791_g15100_i0,NODE_20645_length_227_cov_9.369792_g20555_i0,NODE_24573_length_216_cov_3.4585	NODE_2724_length_246_cov_1.000000_g2690_i0,NODE_2929_length_243_cov_1.021277_g2895_i0
Gagliardi2018-VonSchack2018	2572	19	0	NODE_3607_length_396_cov_4.157895_g3518_i0,NODE_11365_length_273_cov_6.000000_g11275_i0,NODE_11880_length_269_cov_9.423077_g11790_i0,NODE_15190_length_250_cov_3.362791_g15100_i0,NODE_20645_length_227_cov_9.369792_g20555_i0,NODE_24573_length_216_cov_3.4585	NODE_24_length_857_cov_5.978803_g21_i0,NODE_37_length_701_cov_9.058824_g34_i0,NODE_62_length_582_cov_5.705882_g56_i0,NODE_254_length_351_cov_5.743243_g247_i0,NODE_364_length_317_cov_5.354962_g357_i0,NODE_509_length_281_cov_4.084071_g502_i0,NODE_1462_length_198_cov_5.937063_g1455_i0,NODE_1700_length_189_cov_5.917910_g1693_i0,NODE_1836_length_185_cov_3.346154_g1829_i0,NODE_2202_length_175_cov_6.766…
Brohawn2016-Ladd2017	34	29419	8	NODE_36811_length_959_cov_12.997788_g31493_i0,NODE_199733_length_425_cov_4.894595_g191626_i0,NODE_888801_length_215_cov_4.662500_g880653_i0,NODE_291947_length_359_cov_2.503289_g283799_i0,NODE_469243_length_293_cov_2.079832_g461095_i0,NODE_474522_length_291_cov_3.661017_g466374_i0,NODE_479328_length_290_cov_2.246809_g471180_i0,NODE_483758_length_289_cov_1.957265_g475610_i0,NODE_528261_length_278_c…	NODE_98403_length_297_cov_9.041322_g95930_i0,NODE_98405_length_297_cov_8.933884_g95932_i0,NODE_92663_length_304_cov_4.036145_g90190_i0,NODE_84948_length_314_cov_4.911197_g82475_i0,NODE_98415_length_297_cov_8.347107_g95942_i0,NODE_5782_length_1020_cov_9.39
Brohawn2016-Brohawn2019	8	156	34	NODE_36811_length_959_cov_12.997788_g31493_i0,NODE_568106_length_270_cov_1.767442_g559958_i0,NODE_727728_length_243_cov_1.010638_g719580_i0,NODE_718701_length_244_cov_1.005291_g710553_i0,NODE_745880_length_241_cov_1.021505_g737732_i0,NODE_745917_length_241_cov_1.021505_g737769_i0,NODE_745928_length_241_cov_1.016129_g737780_i0,NODE_745949_length_241_cov_1.000000_g737801_i0	NODE_164634_length_849_cov_1.829238_g144734_i0,NODE_266601_length_631_cov_3.040268_g242232_i0,NODE_356114_length_523_cov_5.549180_g329708_i0,NODE_990540_length_256_cov_1.040724_g962634_i0,NODE_522104_length_402_cov_5.046322_g494417_i0,NODE_942405_length_264_cov_1.004367_g914499_i0,NODE_952925_length_262_cov_2.092511_g925019_i0,NODE_966362_length_260_cov_1.022222_g938456_i0,NODE_990571_length_256_…	NODE_199733_length_425_cov_4.894595_g191626_i0,NODE_888801_length_215_cov_4.662500_g880653_i0,NODE_474522_length_291_cov_3.661017_g466374_i0,NODE_291947_length_359_cov_2.503289_g283799_i0,NODE_612760_length_261_cov_2.373786_g604612_i0,NODE_755269_length_239_cov_3.864130_g747121_i0,NODE_528261_length_278_cov_4.251121_g520113_i0,NODE_591740_length_265_cov_2.495238_g583592_i0,NODE_469243_length_293_…	NODE_240773_length_673_cov_4.968652_g217262_i0,NODE_287610_length_601_cov_4.415194_g262642_i0,NODE_821887_length_291_cov_4.312500_g793981_i0,NODE_332646_length_547_cov_3.835938_g306650_i0,NODE_436293_length_456_cov_4.244656_g409024_i0,NODE_630503_length_352_cov_4.179811_g602611_i0,NODE_673616_length_336_cov_4.302326_g645710_i0,NODE_793850_length_299_cov_2.848485_g765944_i0,NODE_816349_length_293_…
Brohawn2016-Shin2014	42	1010	0	NODE_36811_length_959_cov_12.997788_g31493_i0,NODE_199733_length_425_cov_4.894595_g191626_i0,NODE_888801_length_215_cov_4.662500_g880653_i0,NODE_291947_length_359_cov_2.503289_g283799_i0,NODE_397304_length_314_cov_1.316602_g389156_i0,NODE_469243_length_293_cov_2.079832_g461095_i0,NODE_474522_length_291_cov_3.661017_g466374_i0,NODE_479328_length_290_cov_2.246809_g471180_i0,NODE_483758_length_289_c…	NODE_29544_length_283_cov_1.290323_g28748_i0,NODE_3291_length_1290_cov_3.596016_g3049_i0,NODE_4877_length_1021_cov_3.517241_g4527_i0,NODE_6743_length_830_cov_5.728302_g6277_i0,NODE_7148_length_796_cov_3.806833_g6659_i0,NODE_7363_length_777_cov_4.909704_g6
Brohawn2016-Humphrys2016	42	2	0	NODE_36811_length_959_cov_12.997788_g31493_i0,NODE_199733_length_425_cov_4.894595_g191626_i0,NODE_888801_length_215_cov_4.662500_g880653_i0,NODE_291947_length_359_cov_2.503289_g283799_i0,NODE_397304_length_314_cov_1.316602_g389156_i0,NODE_469243_length_293_cov_2.079832_g461095_i0,NODE_474522_length_291_cov_3.661017_g466374_i0,NODE_479328_length_290_cov_2.246809_g471180_i0,NODE_483758_length_289_c…	NODE_2724_length_246_cov_1.000000_g2690_i0,NODE_2929_length_243_cov_1.021277_g2895_i0
Brohawn2016-VonSchack2018	41	18	1	NODE_36811_length_959_cov_12.997788_g31493_i0,NODE_199733_length_425_cov_4.894595_g191626_i0,NODE_888801_length_215_cov_4.662500_g880653_i0,NODE_291947_length_359_cov_2.503289_g283799_i0,NODE_397304_length_314_cov_1.316602_g389156_i0,NODE_469243_length_293_cov_2.079832_g461095_i0,NODE_474522_length_291_cov_3.661017_g466374_i0,NODE_479328_length_290_cov_2.246809_g471180_i0,NODE_483758_length_289_c…	NODE_24_length_857_cov_5.978803_g21_i0,NODE_37_length_701_cov_9.058824_g34_i0,NODE_62_length_582_cov_5.705882_g56_i0,NODE_254_length_351_cov_5.743243_g247_i0,NODE_364_length_317_cov_5.354962_g357_i0,NODE_509_length_281_cov_4.084071_g502_i0,NODE_1462_length_198_cov_5.937063_g1455_i0,NODE_1836_length_185_cov_3.346154_g1829_i0,NODE_2202_length_175_cov_6.766667_g2195_i0,NODE_2751_length_165_cov_2.145…	NODE_844854_length_227_cov_4.976744_g836706_i0	NODE_1700_length_189_cov_5.917910_g1693_i0
Ladd2017-Brohawn2019	29425	188	2	NODE_98403_length_297_cov_9.041322_g95930_i0,NODE_98405_length_297_cov_8.933884_g95932_i0,NODE_92663_length_304_cov_4.036145_g90190_i0,NODE_84948_length_314_cov_4.911197_g82475_i0,NODE_98415_length_297_cov_8.347107_g95942_i0,NODE_5782_length_1020_cov_9.39
Ladd2017-Shin2014	29425	1008	2	NODE_98403_length_297_cov_9.041322_g95930_i0,NODE_98405_length_297_cov_8.933884_g95932_i0,NODE_92663_length_304_cov_4.036145_g90190_i0,NODE_84948_length_314_cov_4.911197_g82475_i0,NODE_98415_length_297_cov_8.347107_g95942_i0,NODE_5782_length_1020_cov_9.39
Ladd2017-Humphrys2016	29427	2	0	NODE_98403_length_297_cov_9.041322_g95930_i0,NODE_98405_length_297_cov_8.933884_g95932_i0,NODE_92663_length_304_cov_4.036145_g90190_i0,NODE_84948_length_314_cov_4.911197_g82475_i0,NODE_98415_length_297_cov_8.347107_g95942_i0,NODE_5782_length_1020_cov_9.39
Ladd2017-VonSchack2018	29427	19	0	NODE_98403_length_297_cov_9.041322_g95930_i0,NODE_98405_length_297_cov_8.933884_g95932_i0,NODE_92663_length_304_cov_4.036145_g90190_i0,NODE_84948_length_314_cov_4.911197_g82475_i0,NODE_98415_length_297_cov_8.347107_g95942_i0,NODE_5782_length_1020_cov_9.39
Brohawn2019-Shin2014	190	1010	0	NODE_164634_length_849_cov_1.829238_g144734_i0,NODE_240773_length_673_cov_4.968652_g217262_i0,NODE_287610_length_601_cov_4.415194_g262642_i0,NODE_266601_length_631_cov_3.040268_g242232_i0,NODE_821887_length_291_cov_4.312500_g793981_i0,NODE_332646_length_547_cov_3.835938_g306650_i0,NODE_356114_length_523_cov_5.549180_g329708_i0,NODE_990540_length_256_cov_1.040724_g962634_i0,NODE_436293_length_456_…	NODE_29544_length_283_cov_1.290323_g28748_i0,NODE_3291_length_1290_cov_3.596016_g3049_i0,NODE_4877_length_1021_cov_3.517241_g4527_i0,NODE_6743_length_830_cov_5.728302_g6277_i0,NODE_7148_length_796_cov_3.806833_g6659_i0,NODE_7363_length_777_cov_4.909704_g6
Brohawn2019-Humphrys2016	190	2	0	NODE_164634_length_849_cov_1.829238_g144734_i0,NODE_240773_length_673_cov_4.968652_g217262_i0,NODE_287610_length_601_cov_4.415194_g262642_i0,NODE_266601_length_631_cov_3.040268_g242232_i0,NODE_821887_length_291_cov_4.312500_g793981_i0,NODE_332646_length_547_cov_3.835938_g306650_i0,NODE_356114_length_523_cov_5.549180_g329708_i0,NODE_990540_length_256_cov_1.040724_g962634_i0,NODE_436293_length_456_…	NODE_2724_length_246_cov_1.000000_g2690_i0,NODE_2929_length_243_cov_1.021277_g2895_i0
Brohawn2019-VonSchack2018	190	19	0	NODE_164634_length_849_cov_1.829238_g144734_i0,NODE_240773_length_673_cov_4.968652_g217262_i0,NODE_287610_length_601_cov_4.415194_g262642_i0,NODE_266601_length_631_cov_3.040268_g242232_i0,NODE_821887_length_291_cov_4.312500_g793981_i0,NODE_332646_length_547_cov_3.835938_g306650_i0,NODE_356114_length_523_cov_5.549180_g329708_i0,NODE_990540_length_256_cov_1.040724_g962634_i0,NODE_436293_length_456_…	NODE_24_length_857_cov_5.978803_g21_i0,NODE_37_length_701_cov_9.058824_g34_i0,NODE_62_length_582_cov_5.705882_g56_i0,NODE_254_length_351_cov_5.743243_g247_i0,NODE_364_length_317_cov_5.354962_g357_i0,NODE_509_length_281_cov_4.084071_g502_i0,NODE_1462_length_198_cov_5.937063_g1455_i0,NODE_1700_length_189_cov_5.917910_g1693_i0,NODE_1836_length_185_cov_3.346154_g1829_i0,NODE_2202_length_175_cov_6.766…
Shin2014-Humphrys2016	1010	2	0	NODE_29544_length_283_cov_1.290323_g28748_i0,NODE_3291_length_1290_cov_3.596016_g3049_i0,NODE_4877_length_1021_cov_3.517241_g4527_i0,NODE_6743_length_830_cov_5.728302_g6277_i0,NODE_7148_length_796_cov_3.806833_g6659_i0,NODE_7363_length_777_cov_4.909704_g6	NODE_2724_length_246_cov_1.000000_g2690_i0,NODE_2929_length_243_cov_1.021277_g2895_i0
Shin2014-VonSchack2018	1010	19	0	NODE_29544_length_283_cov_1.290323_g28748_i0,NODE_3291_length_1290_cov_3.596016_g3049_i0,NODE_4877_length_1021_cov_3.517241_g4527_i0,NODE_6743_length_830_cov_5.728302_g6277_i0,NODE_7148_length_796_cov_3.806833_g6659_i0,NODE_7363_length_777_cov_4.909704_g6	NODE_24_length_857_cov_5.978803_g21_i0,NODE_37_length_701_cov_9.058824_g34_i0,NODE_62_length_582_cov_5.705882_g56_i0,NODE_254_length_351_cov_5.743243_g247_i0,NODE_364_length_317_cov_5.354962_g357_i0,NODE_509_length_281_cov_4.084071_g502_i0,NODE_1462_length_198_cov_5.937063_g1455_i0,NODE_1700_length_189_cov_5.917910_g1693_i0,NODE_1836_length_185_cov_3.346154_g1829_i0,NODE_2202_length_175_cov_6.766…
Humphrys2016-VonSchack2018	2	19	0	NODE_2724_length_246_cov_1.000000_g2690_i0,NODE_2929_length_243_cov_1.021277_g2895_i0	NODE_24_length_857_cov_5.978803_g21_i0,NODE_37_length_701_cov_9.058824_g34_i0,NODE_62_length_582_cov_5.705882_g56_i0,NODE_254_length_351_cov_5.743243_g247_i0,NODE_364_length_317_cov_5.354962_g357_i0,NODE_509_length_281_cov_4.084071_g502_i0,NODE_1462_length_198_cov_5.937063_g1455_i0,NODE_1700_length_189_cov_5.917910_g1693_i0,NODE_1836_length_185_cov_3.346154_g1829_i0,NODE_2202_length_175_cov_6.766…

## Sheet: DoubleDark
Comparison	Amount1	Amount2	Both_Amount	List1	List2	Both_List1	Both_List2
OurStudyALSblood-Linsley2014	856	256	2	NODE_31146_length_1836_cov_16.6508_g27043_i0,NODE_208299_length_613_cov_5.60215_g192620_i0,NODE_252269_length_538_cov_4.7205_g235764_i0,NODE_374738_length_408_cov_5.15297_g357359_i0,NODE_375944_length_407_cov_5.91193_g358565_i0,NODE_376530_length_406_cov_	NODE_36642_length_334_cov_0.903010_g35923_i0,NODE_37611_length_327_cov_0.565068_g36892_i0,NODE_37839_length_325_cov_0.672414_g37120_i0,NODE_38289_length_321_cov_0.629371_g37570_i0,NODE_38302_length_321_cov_0.510490_g37583_i0,NODE_38304_length_321_cov_0.479021_g37585_i0,NODE_38386_length_320_cov_1.140351_g37667_i0,NODE_38399_length_320_cov_0.964912_g37680_i0,NODE_38401_length_320_cov_0.947368_g376…	NODE_263421_length_522_cov_4.88009_g246790_i0,NODE_2866874_length_107_cov_4.84615_g2849460_i0	NODE_38177_length_322_cov_0.574913_g37458_i0,NODE_38756_length_320_cov_0.610526_g38037_i0
OurStudyALSblood-Gagliardi2018	855	1136	3	NODE_31146_length_1836_cov_16.6508_g27043_i0,NODE_208299_length_613_cov_5.60215_g192620_i0,NODE_252269_length_538_cov_4.7205_g235764_i0,NODE_263421_length_522_cov_4.88009_g246790_i0,NODE_374738_length_408_cov_5.15297_g357359_i0,NODE_375944_length_407_cov_	NODE_2856_length_426_cov_7.838875_g2771_i0,NODE_6674_length_324_cov_2.840830_g6584_i0,NODE_9910_length_285_cov_18.380000_g9820_i0,NODE_12222_length_267_cov_4.581897_g12132_i0,NODE_13197_length_261_cov_2.557522_g13107_i0,NODE_14583_length_253_cov_4.495413_
OurStudyALSblood-Brohawn2016	858	9	0	NODE_31146_length_1836_cov_16.6508_g27043_i0,NODE_208299_length_613_cov_5.60215_g192620_i0,NODE_252269_length_538_cov_4.7205_g235764_i0,NODE_263421_length_522_cov_4.88009_g246790_i0,NODE_374738_length_408_cov_5.15297_g357359_i0,NODE_375944_length_407_cov_	NODE_121171_length_536_cov_1.488565_g113276_i0,NODE_671847_length_250_cov_3.476923_g663699_i0,NODE_709850_length_245_cov_1.000000_g701702_i0,NODE_715504_length_244_cov_2.523810_g707356_i0,NODE_727760_length_243_cov_1.010638_g719612_i0,NODE_745937_length_241_cov_1.016129_g737789_i0,NODE_814126_length_231_cov_3.767045_g805978_i0,NODE_878439_length_219_cov_4.134146_g870291_i0,NODE_894792_length_213_…
OurStudyALSblood-Ladd2017	853	7699	5	NODE_31146_length_1836_cov_16.6508_g27043_i0,NODE_208299_length_613_cov_5.60215_g192620_i0,NODE_252269_length_538_cov_4.7205_g235764_i0,NODE_263421_length_522_cov_4.88009_g246790_i0,NODE_374738_length_408_cov_5.15297_g357359_i0,NODE_375944_length_407_cov_	NODE_98445_length_297_cov_7.194215_g95972_i0,NODE_98450_length_297_cov_7.103306_g95977_i0,NODE_98462_length_297_cov_6.822314_g95989_i0,NODE_98469_length_297_cov_6.578512_g95996_i0,NODE_98494_length_297_cov_6.037190_g96021_i0,NODE_98501_length_297_cov_5.77
OurStudyALSblood-Brohawn2019	858	38	0	NODE_31146_length_1836_cov_16.6508_g27043_i0,NODE_208299_length_613_cov_5.60215_g192620_i0,NODE_252269_length_538_cov_4.7205_g235764_i0,NODE_263421_length_522_cov_4.88009_g246790_i0,NODE_374738_length_408_cov_5.15297_g357359_i0,NODE_375944_length_407_cov_	NODE_343249_length_536_cov_1.748503_g317077_i0,NODE_437759_length_455_cov_3.935714_g410482_i0,NODE_518125_length_404_cov_6.184282_g490448_i0,NODE_762305_length_308_cov_1.542125_g734399_i0,NODE_762331_length_308_cov_1.369963_g734425_i0,NODE_933690_length_265_cov_3.400000_g905784_i0,NODE_936179_length_265_cov_1.752174_g908273_i0,NODE_936200_length_265_cov_1.730435_g908294_i0,NODE_936599_length_265_…
OurStudyALSblood-Shin2014	857	107	1	NODE_31146_length_1836_cov_16.6508_g27043_i0,NODE_208299_length_613_cov_5.60215_g192620_i0,NODE_252269_length_538_cov_4.7205_g235764_i0,NODE_263421_length_522_cov_4.88009_g246790_i0,NODE_374738_length_408_cov_5.15297_g357359_i0,NODE_375944_length_407_cov_	NODE_23471_length_330_cov_3.505085_g22675_i0,NODE_30186_length_279_cov_1.540984_g29390_i0,NODE_35781_length_250_cov_1.846512_g34985_i0,NODE_45098_length_218_cov_1.530055_g44302_i0,NODE_45737_length_216_cov_2.270718_g44941_i0,NODE_49017_length_208_cov_1.618497_g48221_i0,NODE_51746_length_202_cov_1.676647_g50950_i0,NODE_54839_length_196_cov_1.515528_g54043_i0,NODE_58223_length_190_cov_1.690323_g574…	NODE_1529015_length_154_cov_3.72727_g1511601_i0	NODE_78553_length_166_cov_1.320611_g77757_i0
OurStudyALSblood-Humphrys2016	858	6	0	NODE_31146_length_1836_cov_16.6508_g27043_i0,NODE_208299_length_613_cov_5.60215_g192620_i0,NODE_252269_length_538_cov_4.7205_g235764_i0,NODE_263421_length_522_cov_4.88009_g246790_i0,NODE_374738_length_408_cov_5.15297_g357359_i0,NODE_375944_length_407_cov_	NODE_1904_length_288_cov_1.643777_g1870_i0,NODE_2717_length_246_cov_1.005236_g2683_i0,NODE_2826_length_244_cov_1.015873_g2792_i0,NODE_2832_length_244_cov_1.015873_g2798_i0,NODE_2992_length_242_cov_1.026738_g2958_i0,NODE_3005_length_241_cov_2.064516_g2971_i0
OurStudyALSblood-VonSchack2018	858	9	0	NODE_31146_length_1836_cov_16.6508_g27043_i0,NODE_208299_length_613_cov_5.60215_g192620_i0,NODE_252269_length_538_cov_4.7205_g235764_i0,NODE_263421_length_522_cov_4.88009_g246790_i0,NODE_374738_length_408_cov_5.15297_g357359_i0,NODE_375944_length_407_cov_	NODE_11_length_1138_cov_17.265928_g9_i0,NODE_167_length_398_cov_6.198251_g160_i0,NODE_1018_length_221_cov_4.289157_g1011_i0,NODE_1085_length_216_cov_3.900621_g1078_i0,NODE_2193_length_175_cov_10.866667_g2186_i0,NODE_5400_length_139_cov_4.892857_g5393_i0,NODE_5767_length_137_cov_2.975610_g5760_i0,NODE_5795_length_137_cov_2.341463_g5788_i0,NODE_8929_length_112_cov_7.842105_g8922_i0
Linsley2014-Gagliardi2018	258	1139	0	NODE_36642_length_334_cov_0.903010_g35923_i0,NODE_37611_length_327_cov_0.565068_g36892_i0,NODE_37839_length_325_cov_0.672414_g37120_i0,NODE_38177_length_322_cov_0.574913_g37458_i0,NODE_38289_length_321_cov_0.629371_g37570_i0,NODE_38302_length_321_cov_0.510490_g37583_i0,NODE_38304_length_321_cov_0.479021_g37585_i0,NODE_38386_length_320_cov_1.140351_g37667_i0,NODE_38399_length_320_cov_0.964912_g376…	NODE_2856_length_426_cov_7.838875_g2771_i0,NODE_6674_length_324_cov_2.840830_g6584_i0,NODE_9910_length_285_cov_18.380000_g9820_i0,NODE_12222_length_267_cov_4.581897_g12132_i0,NODE_13197_length_261_cov_2.557522_g13107_i0,NODE_14583_length_253_cov_4.495413_
Linsley2014-Brohawn2016	258	9	0	NODE_36642_length_334_cov_0.903010_g35923_i0,NODE_37611_length_327_cov_0.565068_g36892_i0,NODE_37839_length_325_cov_0.672414_g37120_i0,NODE_38177_length_322_cov_0.574913_g37458_i0,NODE_38289_length_321_cov_0.629371_g37570_i0,NODE_38302_length_321_cov_0.510490_g37583_i0,NODE_38304_length_321_cov_0.479021_g37585_i0,NODE_38386_length_320_cov_1.140351_g37667_i0,NODE_38399_length_320_cov_0.964912_g376…	NODE_121171_length_536_cov_1.488565_g113276_i0,NODE_671847_length_250_cov_3.476923_g663699_i0,NODE_709850_length_245_cov_1.000000_g701702_i0,NODE_715504_length_244_cov_2.523810_g707356_i0,NODE_727760_length_243_cov_1.010638_g719612_i0,NODE_745937_length_241_cov_1.016129_g737789_i0,NODE_814126_length_231_cov_3.767045_g805978_i0,NODE_878439_length_219_cov_4.134146_g870291_i0,NODE_894792_length_213_…
Linsley2014-Ladd2017	253	7699	5	NODE_36642_length_334_cov_0.903010_g35923_i0,NODE_37611_length_327_cov_0.565068_g36892_i0,NODE_37839_length_325_cov_0.672414_g37120_i0,NODE_38177_length_322_cov_0.574913_g37458_i0,NODE_38289_length_321_cov_0.629371_g37570_i0,NODE_38302_length_321_cov_0.510490_g37583_i0,NODE_38304_length_321_cov_0.479021_g37585_i0,NODE_38386_length_320_cov_1.140351_g37667_i0,NODE_38399_length_320_cov_0.964912_g376…	NODE_98445_length_297_cov_7.194215_g95972_i0,NODE_98450_length_297_cov_7.103306_g95977_i0,NODE_98462_length_297_cov_6.822314_g95989_i0,NODE_98469_length_297_cov_6.578512_g95996_i0,NODE_98494_length_297_cov_6.037190_g96021_i0,NODE_98501_length_297_cov_5.77
Linsley2014-Brohawn2019	258	38	0	NODE_36642_length_334_cov_0.903010_g35923_i0,NODE_37611_length_327_cov_0.565068_g36892_i0,NODE_37839_length_325_cov_0.672414_g37120_i0,NODE_38177_length_322_cov_0.574913_g37458_i0,NODE_38289_length_321_cov_0.629371_g37570_i0,NODE_38302_length_321_cov_0.510490_g37583_i0,NODE_38304_length_321_cov_0.479021_g37585_i0,NODE_38386_length_320_cov_1.140351_g37667_i0,NODE_38399_length_320_cov_0.964912_g376…	NODE_343249_length_536_cov_1.748503_g317077_i0,NODE_437759_length_455_cov_3.935714_g410482_i0,NODE_518125_length_404_cov_6.184282_g490448_i0,NODE_762305_length_308_cov_1.542125_g734399_i0,NODE_762331_length_308_cov_1.369963_g734425_i0,NODE_933690_length_265_cov_3.400000_g905784_i0,NODE_936179_length_265_cov_1.752174_g908273_i0,NODE_936200_length_265_cov_1.730435_g908294_i0,NODE_936599_length_265_…
Linsley2014-Shin2014	258	108	0	NODE_36642_length_334_cov_0.903010_g35923_i0,NODE_37611_length_327_cov_0.565068_g36892_i0,NODE_37839_length_325_cov_0.672414_g37120_i0,NODE_38177_length_322_cov_0.574913_g37458_i0,NODE_38289_length_321_cov_0.629371_g37570_i0,NODE_38302_length_321_cov_0.510490_g37583_i0,NODE_38304_length_321_cov_0.479021_g37585_i0,NODE_38386_length_320_cov_1.140351_g37667_i0,NODE_38399_length_320_cov_0.964912_g376…	NODE_23471_length_330_cov_3.505085_g22675_i0,NODE_30186_length_279_cov_1.540984_g29390_i0,NODE_35781_length_250_cov_1.846512_g34985_i0,NODE_45098_length_218_cov_1.530055_g44302_i0,NODE_45737_length_216_cov_2.270718_g44941_i0,NODE_49017_length_208_cov_1.618497_g48221_i0,NODE_51746_length_202_cov_1.676647_g50950_i0,NODE_54839_length_196_cov_1.515528_g54043_i0,NODE_58223_length_190_cov_1.690323_g574…
Linsley2014-Humphrys2016	258	6	0	NODE_36642_length_334_cov_0.903010_g35923_i0,NODE_37611_length_327_cov_0.565068_g36892_i0,NODE_37839_length_325_cov_0.672414_g37120_i0,NODE_38177_length_322_cov_0.574913_g37458_i0,NODE_38289_length_321_cov_0.629371_g37570_i0,NODE_38302_length_321_cov_0.510490_g37583_i0,NODE_38304_length_321_cov_0.479021_g37585_i0,NODE_38386_length_320_cov_1.140351_g37667_i0,NODE_38399_length_320_cov_0.964912_g376…	NODE_1904_length_288_cov_1.643777_g1870_i0,NODE_2717_length_246_cov_1.005236_g2683_i0,NODE_2826_length_244_cov_1.015873_g2792_i0,NODE_2832_length_244_cov_1.015873_g2798_i0,NODE_2992_length_242_cov_1.026738_g2958_i0,NODE_3005_length_241_cov_2.064516_g2971_i0
Linsley2014-VonSchack2018	258	9	0	NODE_36642_length_334_cov_0.903010_g35923_i0,NODE_37611_length_327_cov_0.565068_g36892_i0,NODE_37839_length_325_cov_0.672414_g37120_i0,NODE_38177_length_322_cov_0.574913_g37458_i0,NODE_38289_length_321_cov_0.629371_g37570_i0,NODE_38302_length_321_cov_0.510490_g37583_i0,NODE_38304_length_321_cov_0.479021_g37585_i0,NODE_38386_length_320_cov_1.140351_g37667_i0,NODE_38399_length_320_cov_0.964912_g376…	NODE_11_length_1138_cov_17.265928_g9_i0,NODE_167_length_398_cov_6.198251_g160_i0,NODE_1018_length_221_cov_4.289157_g1011_i0,NODE_1085_length_216_cov_3.900621_g1078_i0,NODE_2193_length_175_cov_10.866667_g2186_i0,NODE_5400_length_139_cov_4.892857_g5393_i0,NODE_5767_length_137_cov_2.975610_g5760_i0,NODE_5795_length_137_cov_2.341463_g5788_i0,NODE_8929_length_112_cov_7.842105_g8922_i0
Gagliardi2018-Brohawn2016	1139	9	0	NODE_2856_length_426_cov_7.838875_g2771_i0,NODE_6674_length_324_cov_2.840830_g6584_i0,NODE_9910_length_285_cov_18.380000_g9820_i0,NODE_12222_length_267_cov_4.581897_g12132_i0,NODE_13197_length_261_cov_2.557522_g13107_i0,NODE_14583_length_253_cov_4.495413_
Gagliardi2018-Ladd2017	1137	7702	2	NODE_2856_length_426_cov_7.838875_g2771_i0,NODE_6674_length_324_cov_2.840830_g6584_i0,NODE_9910_length_285_cov_18.380000_g9820_i0,NODE_13197_length_261_cov_2.557522_g13107_i0,NODE_14583_length_253_cov_4.495413_g14493_i0,NODE_15332_length_249_cov_5.836449_
Gagliardi2018-Brohawn2019	1139	38	0	NODE_2856_length_426_cov_7.838875_g2771_i0,NODE_6674_length_324_cov_2.840830_g6584_i0,NODE_9910_length_285_cov_18.380000_g9820_i0,NODE_12222_length_267_cov_4.581897_g12132_i0,NODE_13197_length_261_cov_2.557522_g13107_i0,NODE_14583_length_253_cov_4.495413_
Gagliardi2018-Shin2014	1138	107	1	NODE_2856_length_426_cov_7.838875_g2771_i0,NODE_6674_length_324_cov_2.840830_g6584_i0,NODE_9910_length_285_cov_18.380000_g9820_i0,NODE_12222_length_267_cov_4.581897_g12132_i0,NODE_13197_length_261_cov_2.557522_g13107_i0,NODE_14583_length_253_cov_4.495413_
Gagliardi2018-Humphrys2016	1139	6	0	NODE_2856_length_426_cov_7.838875_g2771_i0,NODE_6674_length_324_cov_2.840830_g6584_i0,NODE_9910_length_285_cov_18.380000_g9820_i0,NODE_12222_length_267_cov_4.581897_g12132_i0,NODE_13197_length_261_cov_2.557522_g13107_i0,NODE_14583_length_253_cov_4.495413_
Gagliardi2018-VonSchack2018	1139	9	0	NODE_2856_length_426_cov_7.838875_g2771_i0,NODE_6674_length_324_cov_2.840830_g6584_i0,NODE_9910_length_285_cov_18.380000_g9820_i0,NODE_12222_length_267_cov_4.581897_g12132_i0,NODE_13197_length_261_cov_2.557522_g13107_i0,NODE_14583_length_253_cov_4.495413_
Brohawn2016-Ladd2017	8	7703	1	NODE_121171_length_536_cov_1.488565_g113276_i0,NODE_709850_length_245_cov_1.000000_g701702_i0,NODE_715504_length_244_cov_2.523810_g707356_i0,NODE_727760_length_243_cov_1.010638_g719612_i0,NODE_745937_length_241_cov_1.016129_g737789_i0,NODE_814126_length_231_cov_3.767045_g805978_i0,NODE_878439_length_219_cov_4.134146_g870291_i0,NODE_894792_length_213_cov_4.316456_g886644_i0	NODE_98445_length_297_cov_7.194215_g95972_i0,NODE_98450_length_297_cov_7.103306_g95977_i0,NODE_98462_length_297_cov_6.822314_g95989_i0,NODE_98469_length_297_cov_6.578512_g95996_i0,NODE_98494_length_297_cov_6.037190_g96021_i0,NODE_98501_length_297_cov_5.77
Brohawn2016-Brohawn2019	5	34	4	NODE_671847_length_250_cov_3.476923_g663699_i0,NODE_715504_length_244_cov_2.523810_g707356_i0,NODE_727760_length_243_cov_1.010638_g719612_i0,NODE_814126_length_231_cov_3.767045_g805978_i0,NODE_878439_length_219_cov_4.134146_g870291_i0	NODE_437759_length_455_cov_3.935714_g410482_i0,NODE_518125_length_404_cov_6.184282_g490448_i0,NODE_762305_length_308_cov_1.542125_g734399_i0,NODE_762331_length_308_cov_1.369963_g734425_i0,NODE_933690_length_265_cov_3.400000_g905784_i0,NODE_936179_length_265_cov_1.752174_g908273_i0,NODE_936200_length_265_cov_1.730435_g908294_i0,NODE_936599_length_265_cov_1.000000_g908693_i0,NODE_942385_length_264_…	NODE_121171_length_536_cov_1.488565_g113276_i0,NODE_709850_length_245_cov_1.000000_g701702_i0,NODE_745937_length_241_cov_1.016129_g737789_i0,NODE_894792_length_213_cov_4.316456_g886644_i0	NODE_343249_length_536_cov_1.748503_g317077_i0,NODE_1060371_length_245_cov_1.095238_g1032465_i0,NODE_1086926_length_241_cov_1.111650_g1059020_i0,NODE_1211937_length_213_cov_4.730337_g1184031_i0
Brohawn2016-Shin2014	9	108	0	NODE_121171_length_536_cov_1.488565_g113276_i0,NODE_671847_length_250_cov_3.476923_g663699_i0,NODE_709850_length_245_cov_1.000000_g701702_i0,NODE_715504_length_244_cov_2.523810_g707356_i0,NODE_727760_length_243_cov_1.010638_g719612_i0,NODE_745937_length_241_cov_1.016129_g737789_i0,NODE_814126_length_231_cov_3.767045_g805978_i0,NODE_878439_length_219_cov_4.134146_g870291_i0,NODE_894792_length_213_…	NODE_23471_length_330_cov_3.505085_g22675_i0,NODE_30186_length_279_cov_1.540984_g29390_i0,NODE_35781_length_250_cov_1.846512_g34985_i0,NODE_45098_length_218_cov_1.530055_g44302_i0,NODE_45737_length_216_cov_2.270718_g44941_i0,NODE_49017_length_208_cov_1.618497_g48221_i0,NODE_51746_length_202_cov_1.676647_g50950_i0,NODE_54839_length_196_cov_1.515528_g54043_i0,NODE_58223_length_190_cov_1.690323_g574…
Brohawn2016-Humphrys2016	9	6	0	NODE_121171_length_536_cov_1.488565_g113276_i0,NODE_671847_length_250_cov_3.476923_g663699_i0,NODE_709850_length_245_cov_1.000000_g701702_i0,NODE_715504_length_244_cov_2.523810_g707356_i0,NODE_727760_length_243_cov_1.010638_g719612_i0,NODE_745937_length_241_cov_1.016129_g737789_i0,NODE_814126_length_231_cov_3.767045_g805978_i0,NODE_878439_length_219_cov_4.134146_g870291_i0,NODE_894792_length_213_…	NODE_1904_length_288_cov_1.643777_g1870_i0,NODE_2717_length_246_cov_1.005236_g2683_i0,NODE_2826_length_244_cov_1.015873_g2792_i0,NODE_2832_length_244_cov_1.015873_g2798_i0,NODE_2992_length_242_cov_1.026738_g2958_i0,NODE_3005_length_241_cov_2.064516_g2971_i0
Brohawn2016-VonSchack2018	9	9	0	NODE_121171_length_536_cov_1.488565_g113276_i0,NODE_671847_length_250_cov_3.476923_g663699_i0,NODE_709850_length_245_cov_1.000000_g701702_i0,NODE_715504_length_244_cov_2.523810_g707356_i0,NODE_727760_length_243_cov_1.010638_g719612_i0,NODE_745937_length_241_cov_1.016129_g737789_i0,NODE_814126_length_231_cov_3.767045_g805978_i0,NODE_878439_length_219_cov_4.134146_g870291_i0,NODE_894792_length_213_…	NODE_11_length_1138_cov_17.265928_g9_i0,NODE_167_length_398_cov_6.198251_g160_i0,NODE_1018_length_221_cov_4.289157_g1011_i0,NODE_1085_length_216_cov_3.900621_g1078_i0,NODE_2193_length_175_cov_10.866667_g2186_i0,NODE_5400_length_139_cov_4.892857_g5393_i0,NODE_5767_length_137_cov_2.975610_g5760_i0,NODE_5795_length_137_cov_2.341463_g5788_i0,NODE_8929_length_112_cov_7.842105_g8922_i0
Ladd2017-Brohawn2019	7704	38	0	NODE_98445_length_297_cov_7.194215_g95972_i0,NODE_98450_length_297_cov_7.103306_g95977_i0,NODE_98462_length_297_cov_6.822314_g95989_i0,NODE_98469_length_297_cov_6.578512_g95996_i0,NODE_98494_length_297_cov_6.037190_g96021_i0,NODE_98501_length_297_cov_5.77
Ladd2017-Shin2014	7704	108	0	NODE_98445_length_297_cov_7.194215_g95972_i0,NODE_98450_length_297_cov_7.103306_g95977_i0,NODE_98462_length_297_cov_6.822314_g95989_i0,NODE_98469_length_297_cov_6.578512_g95996_i0,NODE_98494_length_297_cov_6.037190_g96021_i0,NODE_98501_length_297_cov_5.77
Ladd2017-Humphrys2016	7704	6	0	NODE_98445_length_297_cov_7.194215_g95972_i0,NODE_98450_length_297_cov_7.103306_g95977_i0,NODE_98462_length_297_cov_6.822314_g95989_i0,NODE_98469_length_297_cov_6.578512_g95996_i0,NODE_98494_length_297_cov_6.037190_g96021_i0,NODE_98501_length_297_cov_5.77
Ladd2017-VonSchack2018	7704	9	0	NODE_98445_length_297_cov_7.194215_g95972_i0,NODE_98450_length_297_cov_7.103306_g95977_i0,NODE_98462_length_297_cov_6.822314_g95989_i0,NODE_98469_length_297_cov_6.578512_g95996_i0,NODE_98494_length_297_cov_6.037190_g96021_i0,NODE_98501_length_297_cov_5.77
Brohawn2019-Shin2014	38	108	0	NODE_343249_length_536_cov_1.748503_g317077_i0,NODE_437759_length_455_cov_3.935714_g410482_i0,NODE_518125_length_404_cov_6.184282_g490448_i0,NODE_762305_length_308_cov_1.542125_g734399_i0,NODE_762331_length_308_cov_1.369963_g734425_i0,NODE_933690_length_265_cov_3.400000_g905784_i0,NODE_936179_length_265_cov_1.752174_g908273_i0,NODE_936200_length_265_cov_1.730435_g908294_i0,NODE_936599_length_265_…	NODE_23471_length_330_cov_3.505085_g22675_i0,NODE_30186_length_279_cov_1.540984_g29390_i0,NODE_35781_length_250_cov_1.846512_g34985_i0,NODE_45098_length_218_cov_1.530055_g44302_i0,NODE_45737_length_216_cov_2.270718_g44941_i0,NODE_49017_length_208_cov_1.618497_g48221_i0,NODE_51746_length_202_cov_1.676647_g50950_i0,NODE_54839_length_196_cov_1.515528_g54043_i0,NODE_58223_length_190_cov_1.690323_g574…
Brohawn2019-Humphrys2016	38	6	0	NODE_343249_length_536_cov_1.748503_g317077_i0,NODE_437759_length_455_cov_3.935714_g410482_i0,NODE_518125_length_404_cov_6.184282_g490448_i0,NODE_762305_length_308_cov_1.542125_g734399_i0,NODE_762331_length_308_cov_1.369963_g734425_i0,NODE_933690_length_265_cov_3.400000_g905784_i0,NODE_936179_length_265_cov_1.752174_g908273_i0,NODE_936200_length_265_cov_1.730435_g908294_i0,NODE_936599_length_265_…	NODE_1904_length_288_cov_1.643777_g1870_i0,NODE_2717_length_246_cov_1.005236_g2683_i0,NODE_2826_length_244_cov_1.015873_g2792_i0,NODE_2832_length_244_cov_1.015873_g2798_i0,NODE_2992_length_242_cov_1.026738_g2958_i0,NODE_3005_length_241_cov_2.064516_g2971_i0
Brohawn2019-VonSchack2018	38	9	0	NODE_343249_length_536_cov_1.748503_g317077_i0,NODE_437759_length_455_cov_3.935714_g410482_i0,NODE_518125_length_404_cov_6.184282_g490448_i0,NODE_762305_length_308_cov_1.542125_g734399_i0,NODE_762331_length_308_cov_1.369963_g734425_i0,NODE_933690_length_265_cov_3.400000_g905784_i0,NODE_936179_length_265_cov_1.752174_g908273_i0,NODE_936200_length_265_cov_1.730435_g908294_i0,NODE_936599_length_265_…	NODE_11_length_1138_cov_17.265928_g9_i0,NODE_167_length_398_cov_6.198251_g160_i0,NODE_1018_length_221_cov_4.289157_g1011_i0,NODE_1085_length_216_cov_3.900621_g1078_i0,NODE_2193_length_175_cov_10.866667_g2186_i0,NODE_5400_length_139_cov_4.892857_g5393_i0,NODE_5767_length_137_cov_2.975610_g5760_i0,NODE_5795_length_137_cov_2.341463_g5788_i0,NODE_8929_length_112_cov_7.842105_g8922_i0
Shin2014-Humphrys2016	108	6	0	NODE_23471_length_330_cov_3.505085_g22675_i0,NODE_30186_length_279_cov_1.540984_g29390_i0,NODE_35781_length_250_cov_1.846512_g34985_i0,NODE_45098_length_218_cov_1.530055_g44302_i0,NODE_45737_length_216_cov_2.270718_g44941_i0,NODE_49017_length_208_cov_1.618497_g48221_i0,NODE_51746_length_202_cov_1.676647_g50950_i0,NODE_54839_length_196_cov_1.515528_g54043_i0,NODE_58223_length_190_cov_1.690323_g574…	NODE_1904_length_288_cov_1.643777_g1870_i0,NODE_2717_length_246_cov_1.005236_g2683_i0,NODE_2826_length_244_cov_1.015873_g2792_i0,NODE_2832_length_244_cov_1.015873_g2798_i0,NODE_2992_length_242_cov_1.026738_g2958_i0,NODE_3005_length_241_cov_2.064516_g2971_i0
Shin2014-VonSchack2018	108	9	0	NODE_23471_length_330_cov_3.505085_g22675_i0,NODE_30186_length_279_cov_1.540984_g29390_i0,NODE_35781_length_250_cov_1.846512_g34985_i0,NODE_45098_length_218_cov_1.530055_g44302_i0,NODE_45737_length_216_cov_2.270718_g44941_i0,NODE_49017_length_208_cov_1.618497_g48221_i0,NODE_51746_length_202_cov_1.676647_g50950_i0,NODE_54839_length_196_cov_1.515528_g54043_i0,NODE_58223_length_190_cov_1.690323_g574…	NODE_11_length_1138_cov_17.265928_g9_i0,NODE_167_length_398_cov_6.198251_g160_i0,NODE_1018_length_221_cov_4.289157_g1011_i0,NODE_1085_length_216_cov_3.900621_g1078_i0,NODE_2193_length_175_cov_10.866667_g2186_i0,NODE_5400_length_139_cov_4.892857_g5393_i0,NODE_5767_length_137_cov_2.975610_g5760_i0,NODE_5795_length_137_cov_2.341463_g5788_i0,NODE_8929_length_112_cov_7.842105_g8922_i0
Humphrys2016-VonSchack2018	6	9	0	NODE_1904_length_288_cov_1.643777_g1870_i0,NODE_2717_length_246_cov_1.005236_g2683_i0,NODE_2826_length_244_cov_1.015873_g2792_i0,NODE_2832_length_244_cov_1.015873_g2798_i0,NODE_2992_length_242_cov_1.026738_g2958_i0,NODE_3005_length_241_cov_2.064516_g2971_i0	NODE_11_length_1138_cov_17.265928_g9_i0,NODE_167_length_398_cov_6.198251_g160_i0,NODE_1018_length_221_cov_4.289157_g1011_i0,NODE_1085_length_216_cov_3.900621_g1078_i0,NODE_2193_length_175_cov_10.866667_g2186_i0,NODE_5400_length_139_cov_4.892857_g5393_i0,NODE_5767_length_137_cov_2.975610_g5760_i0,NODE_5795_length_137_cov_2.341463_g5788_i0,NODE_8929_length_112_cov_7.842105_g8922_i0
